1 **Title Page**

2 **Title:** Sex differences in socioemotional behavior and changes in ventral hippocampal transcription  
3 across aging in C57Bl/6J mice

4 **Authors:** Nina E. Baumgartner <sup>a,b</sup>, Mandy C. Biraud <sup>b</sup>, Elizabeth K. Lucas <sup>a,b</sup>

5 **Affiliations:** <sup>a</sup> Department of Psychiatry and Behavioral Neurobiology, Heersink School of Medicine,  
6 University of Alabama at Birmingham. Birmingham, AL, 35233. <sup>b</sup> Department of Molecular Biomedical  
7 Sciences, College of Veterinary Medicine, North Carolina State University. Raleigh, NC, 27607.

8 **Corresponding author:** Elizabeth K. Lucas, 1719 6<sup>th</sup> Ave S, CIRC 593, Birmingham, AL 35294  
9 (phone) 205-975-0483 (email) elizabethlucas@uabmc.edu

10 **Number of pages:** 33

11 **Number of figures:** 4

12 **Number of tables:** 0

13 **Number of supplementary figures:** 2

14 **Number of supplementary tables:** 6

15 **Funding:** R01 MH123768 (EKL), Brain & Behavior Research Foundation Young Investigator Award  
16 (EKL), and laboratory development funds from the North Carolina State University College of Veterinary  
17 Medicine (EKL) and the University of Alabama at Birmingham Heersink School of Medicine (EKL).

18 **Author Contributions. Nina E. Baumgartner:** Methodology, Formal Analysis, Investigation, Writing –  
19 Original Draft, Writing – Review & Editing, Visualization **Mandy C. Biraud:** Methodology, Formal  
20 Analysis, Investigation, Writing – Review & Editing **Elizabeth K. Lucas:** Conceptualization,  
21 Methodology, Formal Analysis, Investigation, Resources, Writing – Review & Editing, Supervision,  
22 Project Administration, Funding Acquisition.

23 **Roles of the funding source.** The funding sources had no involvement in the study design, analyses,  
24 or interpretation.

25 **Acknowledgments.** Many thanks are due to Averie Bunce and Amy Farthing for assistance with  
26 animal husbandry and vivisection, Arkady Bilenkin for assistance developing the RNA isolation  
27 protocol, Mariangela Martini for uterine dissection training, and Genna St. Amour for Nanostring  
28 training.

## 29 **Abstract (170 word limit)**

30 Socioemotional health is positively correlated with improved cognitive and physical aging.  
31 Despite known sex differences in socioemotional behaviors and trajectory of aging, the interactive  
32 effects between sex and aging on socioemotional outcomes are poorly understood. We performed the  
33 first comprehensive assessment of sex differences in socioemotional behaviors in C57Bl/6J mice  
34 across aging. Compared to males, females exhibited decreased anxiety-like behavior and social  
35 preference, but increased social recognition. With age, anxiety-like behavior, cued threat memory  
36 generalization, and social preference increased in both sexes. To investigate potential neural  
37 mechanisms underlying these behavioral changes, we analyzed transcriptional neuropathology  
38 markers in ventral hippocampus and found age-related changes in genes related to activated microglia,  
39 angiogenesis, and cytokines. Sex differences emerged in timing, direction, and magnitude of these  
40 changes, independent of reproductive senescence in aged females. Interestingly, female-specific  
41 upregulation of autophagy-related genes correlated with age-related behavioral changes selectively in  
42 females. These novel findings reveal critical sex differences in trajectories of ventral hippocampal aging  
43 that may contribute to sex- and age-related differences in socioemotional outcomes.

## 44 **Keywords**

45 avoidance, elevated plus maze, threat conditioning, fear conditioning, social interaction, estrous cycle

## 46 **1. Introduction**

47 Among the wide variety of cognitive and physical changes that occur with aging, socioemotional  
48 wellbeing emerges as a crucial factor in mitigating negative health outcomes in elderly populations  
49 (Charles and Carstensen 2010). Clinical literature has consistently shown a positive relationship  
50 between socioemotional health and improved cognitive (Seeman et al. 2001) and physical (Gill et al.  
51 1997) outcomes in older adults. Although sex differences are observed across multiple species in both  
52 the trajectory of aging (Lemaitre et al. 2020, Hagg and Jylhava 2021) and the risk of socioemotional  
53 dysregulation (Kessler et al. 1994, Weissman et al. 1996, Gater et al. 1998), relatively little is still known  
54 regarding the interactions between age and sex on socioemotional behavior.

55 Preclinical rodent behavioral testing paradigms currently provide the greatest insight into the  
56 underlying biology of these behaviors (Rodgers et al. 1997, Stanley and Adolphs 2013). Of the studies  
57 that have explored sex differences in socioemotional behavior in rodents, results seem to vary greatly  
58 based on age, species, and genetic strain of subjects, as well as based on the types of behavioral tests  
59 used (Frick et al. 2000, Perkins et al. 2016, Domonkos et al. 2017, Hernandez et al. 2020). Sex  
60 differences have been reported in anxiety-like behavior (Kokras and Dalla 2014), social investigation  
61 (Tejada and Rissman 2012), and emotional memory (Bauer 2023), among other behaviors. Across  
62 aging, rodent models demonstrate increases in anxiety-like behavior (Darwish et al. 2001, Boguszewski  
63 and Zagrodzka 2002, Narita et al. 2006, Turner et al. 2012, Stanojlovic et al. 2019, Li et al. 2020,  
64 Hirano et al. 2021, Yanai and Endo 2021), decreases in social behaviors (Guan and Dluzen 1994,  
65 Boguszewski and Zagrodzka 2002, Salchner et al. 2004, Hunt et al. 2011, Perkins et al. 2016, Shoji et  
66 al. 2016, Gerasimenko et al. 2020), and impairments in emotional memory processes (Stoehr and  
67 Wenk 1995, Oler and Markus 1998, Houston et al. 1999, Doyere et al. 2000, Corcoran et al. 2002, Liu  
68 et al. 2003, Feiro and Gould 2005, Gemma et al. 2005, Gould and Feiro 2005, Moyer and Brown 2006,  
69 Fukushima et al. 2008, Kaczorowski and Disterhoft 2009, Peleg et al. 2010, Villeda et al. 2011, Shoji et  
70 al. 2016, Aziz et al. 2019, Shoji and Miyakawa 2019, Ehlers et al. 2020, Yanai and Endo 2021,  
71 Hernandez et al. 2022). Despite these clear effects of age and sex on socioemotional behaviors,  
72 shockingly few studies have directly compared these behaviors in males and females across aging. A  
73 notable connection between these behaviors is their regulation by the ventral hippocampus  
74 (Bannerman et al. 2004, Fanselow and Dong 2010), a brain region known to be sensitive to both age  
75 and sex (Wang et al. 2019, Williams et al. 2020, Porcher et al. 2021, Hodges et al. 2022).

76 Understanding how these sex differences in socioemotional behavior change across the lifespan and  
77 how that relates to ventral hippocampal function is therefore of critical clinical importance, especially  
78 considering that women represent the largest proportion of the aging population (Hagg and Jylhava  
79 2021).

80 Here, we sought to establish the first comprehensive assessment of sex differences in  
81 socioemotional behavior across aging in C57Bl/6J mice. Male and female mice aged 4-, 10-, or 18-

82 months, corresponding to young, middle-aged, and aged human populations, respectively (Flurkey et  
83 al. 2007), were subjected to a battery of behavioral tests related to socioemotional behavior. Female  
84 estrous cycles were monitored throughout the duration of the experiment in order to classify cycling  
85 regularity as a measure of reproductive senescence in females across aging. Following behavioral  
86 testing, ventral hippocampal tissue was analyzed for mRNA quantification using the NanoString  
87 Neuropathology panel to assess expression of 760 transcripts across aging in males and females. Our  
88 unique approach combining comprehensive behavioral testing and transcriptional analyses in the same  
89 subjects provides novel insight into sex- and aging-related changes in socioemotional behaviors and  
90 reveals critical sex differences in the trajectory of ventral hippocampal aging.

## 91 **2. Materials and methods**

### 92 2.1 Subjects

93 Male and female C57BL/6J mice (#00064, Jackson Laboratories, Bar Harbor, ME) were bred in-house  
94 for the purposes of this study. Gonadally-intact mice at 4 (male, n=14; female, n=13), 10 (male, n=11;  
95 female, n=12), or 18 (male, n=12; female, n=13) months of age were used for experimental procedures.  
96 Mice were housed 2-4 per cage with corncob bedding and *ad libitum* access to standard chow (LabDiet  
97 Rodent 5001) and water in an environmentally controlled husbandry room maintained on a 12h:12h  
98 light:dark cycle (lights on at 08:00 AM). Male and female mice of each age group were tested in  
99 separate cohorts to avoid potential confounds of sex pheromones on behavioral assays. All  
100 experiments were approved in advance by the Institutional Animal Care and Use Committee at North  
101 Carolina State University and conducted in accordance with the National Institutes of Health *Guide for*  
102 *the Care and Use of Laboratory Animals*.

### 103 2.2 Estrous Cycle Categorization

104 To categorize the reproductive cycle, mice received vaginal (female) or sham (male) lavages daily  
105 between 8:00-9:00AM, starting 8 days prior to behavioral testing and continuing to euthanasia. Cells  
106 were stained using hematoxylin and eosin, and estrous stages were categorized using standard  
107 cytological methods (Cora et al. 2015). Briefly, proestrus was determined by the predominance of  
108 nucleated epithelial cells, estrus by the predominance of cornified epithelial cells, and diestrus by the

109 presence of leukocytes. Estrous cycle regularity was categorized as regular, irregular, or non-cycling.  
110 Irregular cycling was defined as  $\geq 5$  days in the same cycle stage, and non-cycling was defined as a  
111 total absence of transition of a full cycle (estrus to estrus) for the duration of the experiment (19 days).

## 112 2.3 Behavioral Testing

113 Behavioral testing commenced at 9:00AM, and all mice were handled and tested by the same  
114 researcher (M.C.B.). Male and female mice were tested in separate cohorts, and equipment was  
115 broken down and thoroughly cleaned between cohorts. Mice were habituated to an airlock adjacent the  
116 behavioral testing room 30 mins prior to each behavioral test. All mice went through an identical testing  
117 sequence: Days 1-3, handling; Day 4, elevated plus maze; Day 5, open field test; Day 6, novel object  
118 recognition and object location; Day 7, social interaction and social recognition; Day 8, auditory threat  
119 conditioning; Day 9, cued and contextual threat memory recall. Behavioral data were analyzed blind to  
120 age and sex.

121 *2.3.1 Elevated Plus Maze.* The plus maze consisted of two open arms (30 cm) and two closed arms (30  
122 cm with 15 cm walls) raised 40 cm from the table surface (Panlab, Barcelona, Spain). The arena was  
123 indirectly lit with the center and open arms at 120 lux. Each mouse was placed in the center and  
124 allowed to explore the maze for 5 minutes. Behavior was recorded with an overhead camera and  
125 analyzed offline with AnyMaze software (Stoelting, Wood Dale, IL). Variables of interest included open  
126 arm time and percent open arm entries. Percent open arm entries was calculated as the number of  
127 open arm entries divided by the summed number of open and closed arm entries  $\times 100$ .

128 *2.3.2 Open Field Test.* The apparatus consisted of an opaque gray arena (45 x 45 x 40 cm; Panlab)  
129 indirectly lit at 85 lux. Mice were placed in the corner of the arena and allowed to explore for 10 min.  
130 This test was repeated three times, with mice returned to a holding cage for 20 min between each test.  
131 Behavior was recorded with an overhead camera and analyzed offline with AnyMaze software. The  
132 center zone was set as the inner 225 cm<sup>2</sup> of the area. Distance traveled (m) and center time (s) were  
133 analyzed and averaged across the three trials.

134 *2.3.3 Object Location and Object Recognition Tests.* Three suction toys of similar size but distinct  
135 shape and color were used as objects, and objects were placed 11 cm from the corners of the open

136 field area. For baseline exploration, two objects were placed in opposite corners. Mice were placed in a  
137 corner of the arena not containing an object and allowed to explore for 10 min before returning to a  
138 holding cage for a 20 min break. For the object location test, one of the objects was moved to a  
139 different corner of the arena, and mice were placed back into the arena for 10 min before returning to a  
140 holding cage for a 20 min break. For the novel object recognition test, the object that remained  
141 unmoved in the location test was replaced with a novel object. Mice were placed into the arena for 10  
142 mins before returning to their home cage. Each test was recorded with an overhead camera, and  
143 behavior was analyzed offline using AnyMaze software to manually key interaction time (s) with each  
144 object. While a pilot group demonstrated no baseline preference for the objects used, experimental  
145 mice displayed a clear preference for one of the objects and thus confounded the data. Therefore,  
146 these results are not reported.

147 *2.3.4 Social Interaction and Social Recognition Tests.* The three-chamber social interaction arena  
148 consisted of three chambers (20 x 42 x 22 cm) with transparent walls and removable doors separating  
149 the center chamber from the two outer chambers (Panlab). Mice were habituated in the center chamber  
150 for 5 mins. For the social interaction test, two identical grid enclosures containing either a novel age-  
151 and sex-matched conspecific mouse (Stranger 1) or a small rubber duck (Object) were placed in the  
152 outer chambers. The doors separating the inner and outer chambers were raised, and the test mouse  
153 was allowed to explore the entire apparatus for 10 min. The test mouse was then returned to a holding  
154 cage for a 5 min break, during which time the object was replaced with a novel age- and sex-matched  
155 conspecific (Stranger 2). For the social recognition test, each test mouse was placed in the center  
156 chamber with the doors to the outer chambers raised and allowed to explore the entire apparatus for 10  
157 mins. Position of the Object, Stranger 1, and Stranger 2 were counterbalanced between animals. Each  
158 session was recorded with an overhead camera, and behavior was analyzed offline using AnyMaze  
159 software to manually key interactions with the object and novel conspecifics. Results for social  
160 interaction are expressed as social preference, calculated as a ratio of the time (s) spent investigating  
161 Stranger 1 versus the time (s) spent investigating the Object. Results for social recognition are  
162 calculated as a ratio of the time (s) spent investigating Stranger 2 versus the time (s) spent

163 investigating Stranger 1. One cage of mice from each age cohort per sex were used as the novel  
164 conspecifics and were therefore excluded from subsequent behavioral testing and transcriptional  
165 profiling.

166 *2.3.5 Auditory Threat Conditioning and Recall.* Cued threat conditioning, cued memory recall, and  
167 contextual memory recall were conducted in Habitest modular operant chambers (17.78 cm x 17.78cm  
168 x 30.48cm) housed in sound-attenuating cubicles (Coulbourn, Holliston, MA). The conditioning context  
169 consisted of two clear Plexiglas walls and two stainless steel walls with an aluminum shock grid floor,  
170 and 70% ethanol was used for the odorant. A near infrared camera was mounted behind each operant  
171 chamber, and FreezeFrame4 software (Actimetrics) was used for automated stimulus delivery and  
172 video recording. Auditory threat conditioning consisted of a 240 s baseline period followed by three co-  
173 terminating presentations of the conditioned stimulus (CS; 20 s, 2kHz, 80 dB pure tone) with the  
174 unconditioned stimulus (US; 2 s, 0.7 mA foot shock), with 120 s inter-trial intervals (Lucas et al. 2014).  
175 Thirty seconds after the final stimulus presentation, mice were removed from the operant chamber and  
176 placed into a new home cage. Cued and contextual recall were assessed 24 hrs later. For cued recall,  
177 the walls and the floor of the chamber were covered in white and blue striped inserts, and isopropanol  
178 was used as the odorant. Following a 180 s baseline period, 4 CSs were presented with 80 s inter-trial  
179 intervals. Mice were removed from the operant chamber and returned to their home cage for 2 hrs until  
180 contextual recall. Contextual recall occurred over 3 mins in the conditioning context in the absence of  
181 stimuli.

182 Freezing was analyzed as the conditioned response using Actimetrics FreezeFrame V4  
183 software. Freezing thresholds were set for each mouse, determined by the highest movement index  
184 value representing no movement except for that required for respiration for at least 3 s (du Plessis et al.  
185 2022). Freezing was measured during the baseline period and CS presentations during training and  
186 cued recall and across the entire 3 min trial for contextual recall. To control for the confound of group  
187 differences in baseline freezing, baseline freezing levels were subtracted from our cued and contextual  
188 recall analyses (Anagnostaras et al. 2010, Jacobs et al. 2010). For cued recall, pre-CS baseline



189 freezing was subtracted from averaged CS freezing. For contextual recall, baseline freezing prior to  
190 conditioning was subtracted from total freezing across the 3 min trial.

#### 191 2.4 Nanostring Sample Preparation and Analysis

192 Five days after threat memory recall, mice were deeply anesthetized with Avertin (500 mg/kg; Thermo  
193 Scientific, Waltham, MA) prior to decapitation. Brains were rapidly extracted and flash frozen with 2-  
194 methylbutane on dry ice prior to storage at -80°C. For 18-month-old females, the entire uterine horn  
195 was dissected and weighed at the time of euthanasia to determine uterine index, calculated as the  
196 weight of the uterine horn divided by total body weight. One 18-month female was excluded from  
197 uterine index analysis due to extreme ovarian swelling, likely due to presence of tumor(s) (Smith and  
198 Xu 2008).

199 Brains from a subset of animals from each cohort were selected for transcriptional profiling.  
200 Animals were chosen to represent all litters and cages that underwent all behavioral assays, and  
201 females from the 18-month group included both cycling and non-cycling animals. Brains were sectioned  
202 at a 500  $\mu\text{m}$ , and the entire right ventral hippocampus was collected via 1 mm diameter micropunches  
203 at -2.8mm from Bregma using the Palkovits method (Palkovits 1983). Punches were stored at -80°C  
204 until RNA extraction. Tissue was homogenized in Trizol reagent followed by RNA isolation with the  
205 Qiagen RNeasy Mini Kit (Germantown, MD) following the manufacturer's instructions. Isolated RNA  
206 was purified and concentrated with Amicon Ultra-0.5 Centrifugal Filters (Millipore Sigma, Burlington, MA)  
207 prior to storage at -80°C.

208 The Nanostring Neuropathology panel (NanoString Technologies, Seattle, WA) was used for  
209 transcriptional profiling of 760 targets using highly sensitive outputs of mRNA transcript counts via  
210 color-coded reporter probe detection (Geiss et al. 2008). This technology has repeatedly been shown to  
211 achieve the accuracy of quantitative real-time PCR with enhanced sensitivity for detecting low-  
212 abundance transcripts without relying on amplification steps (Geiss et al. 2008, Malkov et al. 2009, Reis  
213 et al. 2011, Veldman-Jones et al. 2015). RNA was diluted to 20 ng/ $\mu\text{L}$ , and a total of 100 ng of RNA per  
214 sample was hybridized to the capture probesets at 65°C for 21 hrs. Hybridized samples were  
215 immediately processed on the Nanostring nCounter, which purifies and aligns samples onto the internal



216 surface of the sample cartridge prior to barcode reading on the digital analyzer. Twelve samples were  
217 processed per cartridge, and a calibrator sample was used to normalize data between cartridges. Raw  
218 data were assessed for quality control parameters including binding density of barcodes measured,  
219 image quality for each well, assay efficiency, and linearity via comparisons to positive and negative  
220 controls for each well.

221 Raw transcript counts for each gene were normalized to the geometric mean of 10  
222 housekeeping genes: *Aars*, *Asb7*, *Ccdc127*, *Cnot10*, *Csnk2a2*, *Fam104a*, *Lars*, *Mto1*, *Supt7l*, *Tada2b*.  
223 The expression of the individual housekeeping genes, as well as their geometric mean, was not found  
224 to differ across age or sex. Counts were further normalized to the calibrator sample on each cartridge to  
225 normalize for variability between cartridges. To determine differentially expressed genes, pairwise  
226 comparisons of normalized transcript counts were performed between ages within each sex. A  
227 threshold of Benjamini-Hochberg False Discovery Rate (FDR) adjusted p-value of < 0.1 was used to  
228 set statistical significance for differentially expressed genes (Benjamini et al. 2001).

229 Transcript data was further analyzed using the nSolver Pathway Analysis Tool, which groups  
230 genes into pre-assigned pathways based on putative gene function and reports a pathway score as the  
231 log<sub>2</sub> fold change versus a reference group. For pathway comparisons examining the effects of aging  
232 within each sex, the younger age group for each sex was considered the reference group. For pathway  
233 comparisons examining the effect of reproductive senescence in 18-month females, cycling females  
234 were considered the reference group. To determine changes in pathways across aging, pairwise  
235 comparisons of normalized pathway scores were performed between ages within each sex, and  
236 Benjamini-Hochberg FDR adjusted *p*-values of < 0.05 were considered statistically significant.

## 237 2.5 Statistical Analyses

238 Statistical analyses were conducted with IBM SPSS (Armonk, NY), GraphPad Prism (San Diego, CA),  
239 and nSolver Advanced Analysis (NanoString Technologies). Normal distribution and homogeneity of  
240 variance were assessed before proceeding to the appropriate parametric or non-parametric tests. Two-  
241 tailed independent-samples t-tests or Mann-Whitney U tests were used to compare two groups with  
242 one independent variable. One-way analysis of variance (ANOVA) or Kruskal-Wallis H tests were used

243 for one dependent variable and  $\geq 3$  groups. Two-way ANOVA was used to compare the interaction  
244 between age and sex on dependent variables. Three-way repeated-measures ANOVA was used to  
245 compare three independent variables in which one variable repeated. In the case that sphericity was  
246 violated, statistical values are reported from the Greenhouse-Geisser correction. Chi-squared tests for  
247 independence were used for categorical data. Correlations between behavioral measures and pathway  
248 scores or gene expressions were assessed by calculating the Pearson correlation coefficient.  
249 Familywise  $\alpha$  was maintained at 0.05 with Bonferroni adjustments for all *post-hoc* tests except the  
250 determination of differentially expressed genes, which used the Benjamini-Hochberg FDR adjustment  
251 with an adjusted  $p$ -value threshold of 0.1. Non-parametric data are graphed as box and whisker plots,  
252 and parametric data are graphed as mean  $\pm$  standard error. Full statistics for all analyses are reported  
253 in Tables S1, S3, S4, S5, and S6.

### 254 **3. Results**

#### 255 3.1 Aging broadly impacts socioemotional behavior

256 Mice were taken through a battery of behavioral tests that measure different endophenotypes of  
257 socioemotional behavior at 4, 10, or 18 months of age (Figure 1A; for statistics, see Table S1). We first  
258 assessed open arm avoidance on the elevated plus maze as a measure of anxiety-like behavior. Two-  
259 way ANOVAs revealed main effects of age and sex on time spent in the open arms (Figure 1B) as well  
260 as main effects of age and sex on the percent of open arm entries (Figure 1C). These results indicate  
261 decreased open arm avoidance in females as compared to males and increased open arm avoidance  
262 across aging irrespective of sex. We next assessed locomotor activity and center avoidance in the open  
263 field test and observed no effects of age or sex on this assay (Figure 1D-E). These results demonstrate  
264 that aging does not grossly impact locomotor activity and that sex- and age-related differences in  
265 avoidance behavior are assay-specific.

266 To assess social behavior and cognition, mice next underwent the social interaction and social  
267 recognition tests with novel age- and sex-matched conspecifics. In the social interaction test, two-way  
268 ANOVA revealed a main effect of age and sex on social preference, with males displaying higher levels  
269 of social preference than females and levels increasing with age across both sexes (Figure 1F). In the

270 social recognition test, two-way ANOVA revealed a main effect of sex, but not age, with females  
271 displaying higher levels of social recognition than males (Figure 1G). Together, these results indicate  
272 that preference for social interaction increases with age and that males exhibit increased social  
273 preference and decreased social recognition as compared to females.

274 Finally, emotional memory was assessed with auditory threat conditioning followed by cued and  
275 contextual memory recall the following day. Memory acquisition and recall was assessed by freezing,  
276 the dominant defensive behavioral response evoked by threatening stimuli in mice (Blanchard and  
277 Blanchard 1969, Fanselow 1980). To assess threat memory acquisition, we performed a three-way  
278 repeated-measures ANOVA to determine the impact of age and sex on freezing during the CS across  
279 the three CS-US trials during training (for descriptive statistics, see Table S1). We found a main effect  
280 of CS-US pairing, a main effect of age, and an interaction between age and CS-US pairing. To better  
281 understand this interaction, we performed pairwise comparisons between each age at each CS-US  
282 pairing, using the Bonferroni correction for multiple testing, and found increased freezing in 18-month  
283 compared to 4-month mice at the second CS, indicating accelerated memory acquisition in aged mice.  
284 Twenty-four hours later, cued threat memory recall was assessed by CS-freezing in a novel context.  
285 Two hours later, contextual threat memory recall was assessed in the conditioning context. We first  
286 performed repeated-measures ANOVAs to assess within-group differences between pre-CS baseline  
287 freezing in the novel context, averaged freezing across the four CSs in the novel context, and freezing  
288 in the conditioning context (Figure S1). Young adult mice exhibited enhanced CS freezing compared to  
289 freezing in the novel and conditioning contexts, an effect that was lost with age. As we observed group  
290 differences in freezing not only during the pre-CS baseline period in the novel context but also during  
291 the pre-conditioning baseline period, we normalized our cued and contextual recall data by baseline  
292 subtraction to directly compare groups. Cued threat memory recall data was normalized by subtracting  
293 pre-CS baseline freezing from averaged CS freezing within each subject. Two-way ANOVA revealed a  
294 main effect of age with decreased normalized CS freezing as age increases (Figure 1H). Contextual  
295 recall data was normalized by subtracting pre-conditioning baseline freezing from contextual recall  
296 freezing. Two-way ANOVA revealed an interaction between age and sex on normalized contextual

297 freezing (Figure 1I). To better understand this interaction, we conducted planned *post-hoc* comparisons  
298 of freezing between sexes at 4, 10, and 18 months, but no comparisons survived the Bonferroni  
299 correction for multiple testing. These results indicate that cued threat memory generalizes with age, as  
300 18-month animals exhibit similar freezing during the pre-CS baseline period as during CS presentation  
301 in a novel context.

### 302 3.2 Sex differences in trajectory of aging-related changes in ventral hippocampal transcript expression

303 We next became interested in the ventral hippocampus, a brain region known to regulate  
304 socioemotional behaviors (Bannerman et al. 2004, Fanselow and Dong 2010) and that exhibits sex-  
305 and age-related differences (Wang et al. 2019, Williams et al. 2020, Porcher et al. 2021, Hodges et al.  
306 2022). To better understand the impact of aging and sex on ventral hippocampal physiology, we  
307 performed transcriptional profiling of a subset of mice used for behavioral testing. RNA was extracted  
308 from ventral hippocampal tissue from mice at 4, 10, and 18 months of age and analyzed using the  
309 NanoString Neuropathology panel to quantify transcript counts from 760 genes (for list, see Table S2)  
310 with established involvement in neuropathological processes (Preuss et al. 2020, Cao et al. 2021). We  
311 performed pairwise comparisons to detect differentially expressed genes across age within each sex,  
312 setting FDR-adjusted  $p < 0.1$  for detection of statistically significant changes (Figure 2).

313 A total of 44 transcripts were differentially expressed across aging (Figure 2A; for statistics, see  
314 Table S3). Interestingly, the age of these transcriptional changes differed between the sexes with  
315 females being impacted later than males. In females, no changes were observed between 4 and 10  
316 months of age. Eighteen transcripts were differentially expressed between 4 and 18 months, and 13  
317 transcripts were differentially expressed between 10 and 18 months. In males, on the other hand, all  
318 age-related transcriptional changes occurred by 10 months of age, with no changes between 10 and 18  
319 months. Seventeen transcripts were differentially expressed between 4 and 18 months, and 29  
320 transcripts were differentially expressed between 4 and 10 months. Among the 44 total transcripts  
321 exhibiting age-related changes, only 11 were shared between males and females. We also found sex  
322 differences in the direction of differentially expressed transcripts (Figure 2B): transcript expression  
323 increased with age in females, whereas transcripts were both up- and downregulated in males. To

324 directly compare the interaction between age and sex, we conducted two-way ANOVAs on these 44  
325 differentially expressed genes (Figure S2; for statistics, see Table S4). In the case of significant  
326 interactions, Bonferroni-corrected *post-hoc* tests revealed more sex differences occurring at 10 months  
327 than at 4 and 18 months combined, further highlighting sex differences in the timing of transcriptional  
328 aging of the ventral hippocampus. Together, results indicate specific patterns in ventral hippocampal  
329 aging in which sex differences occur in timing, direction, and identity of transcriptional changes.

330 To determine the functional significance of age-related transcriptional changes, we next  
331 investigated changes in functional pathways using the nSolver Pathway analysis tool (for a list of  
332 transcripts included in each pathway, see Table S2). We performed pairwise comparisons of the 23  
333 pathway scores and set statistical significance as FDR-adjusted  $p < 0.05$  (Figure 3A; for statistics, see  
334 Table S5). We found that angiogenesis and autophagy increased with age in both sexes, whereas  
335 cytokines and neuronal cytoskeleton increased with age selectively in females.

336 To identify differentially expressed genes that may be involved in the observed behavioral  
337 differences, we performed correlational analyses comparing each of the pathways to each of our  
338 behavioral measures (Figure 1) in order to determine if any pathway had a particularly strong  
339 correlation with socioemotional behavior changes across aging. Although several pathways showed  
340 significant age-related changes across aging or significant correlations with behavioral measures  
341 (Table S6), we chose to narrow our focus to the autophagy pathway because it uniquely demonstrated  
342 significant changes between the 4- and 18-month time points in both males and females, and it showed  
343 significant correlations with multiple socioemotional behavioral measures (Figure 3A-B). In females,  
344 autophagy pathway scores were negatively correlated with percent of open arm entries on the EPM,  
345 time spent in the open arms on the EPM, and the normalized percent of time spent freezing in response  
346 to the CS during cued threat memory recall. In males, however, autophagy pathways scores did not  
347 correlate with any behavioral measure (Table S6).

348 Due to this sex difference in the relationship between autophagy pathway scores and  
349 socioemotional behaviors, we chose to investigate the relationship between differentially expressed  
350 autophagy genes and behavioral measures. Of the four autophagy transcripts that were differentially

351 expressed across aging (Figure 2), three were specifically increased in females (*Cd68*, *Gusb*, *Man2b1*)  
352 while one was similarly increased in both sexes across aging (*Hexb*). We then tested the correlations  
353 between these four genes and the three behavioral measures that correlated with autophagy pathway  
354 scores (Figure 3C-F; for statistics, see Table S6). We found that percent of open arm entries on the  
355 EPM was negatively correlated with *Cd68*, *Gusb*, and *Man2b1* in females, but not males. The amount  
356 of time spent in the open arms on the EPM was negatively correlated with *Cd68*, *Gusb*, and *Hexb* in  
357 females, and with *Man2b1* in both females and males. The normalized percent of time spent freezing to  
358 the CS during cued recall was negatively correlated with *Cd68*, *Man2b1*, and *Hexb* in females, but not  
359 males. Together, these results indicate that sex differences in trajectory of ventral hippocampal aging  
360 coincides with sex-specific transcriptional associations with socioemotional behaviors.

### 361 3.3 No impact of female reproductive status on socioemotional behavior or ventral hippocampal 362 transcript expression

363 Because of the well-established influence of ovarian hormones on socioemotional behaviors and  
364 hippocampal function (Walf and Frye 2006), we next sought to determine the impact of reproductive  
365 senescence on socioemotional behaviors and ventral hippocampal transcript expression. To establish  
366 ovarian reproductive status, we categorized estrous cycle regularity in females across the three ages.  
367 The proportion of females exhibiting regular estrous cycles decreased between 4 and 18 months and  
368 between 10 and 18 months (Figure 4A-B). Complete arrest of the estrous cycle, an indication of  
369 reproductive senescence (Felicio et al. 1984), was observed for approximately half of the 18-month  
370 group, so we compared cycling and non-cycling females at this age. Consistent with decreased  
371 circulating estradiol levels (Evans et al. 1941), uterine index was decreased in the non-cycling group as  
372 compared to the cycling group (Figure 4C). Notably, this effect was not due to differed body weight  
373 between groups (Figure 4D). For socioemotional behavior, we observed no effect of cycling status on  
374 any outcome (Figure 4E-J). Finally, ventral hippocampal transcript analysis revealed no differentially  
375 expressed genes (Figure 4K) or changes in transcriptional pathways (Figure 4L) meeting the threshold  
376 of statistical significance in cycling versus non-cycling females at 18 months. Although these analyses  
377 are likely underpowered to detect subtle differences between cycling and non-cycling females, our

378 findings suggest that reproductive senescence in aged females does not substantially impact  
379 socioemotional behavior or ventral hippocampal transcription.

#### 380 **4. Discussion**

381 This project provides the most comprehensive assessment of sex differences in socioemotional  
382 behaviors and novel sex-specific changes in the ventral hippocampal transcriptome across aging in  
383 young adult (4-month), middle-aged (10-month), and aged (18-month) C57Bl/6J mice to date. We  
384 report age-related differences in anxiety-like behavior, social preference, and threat memory  
385 generalization, as well as sex differences in anxiety-like behavior, social preference, and social  
386 recognition. These sex- and age-related behavioral changes were accompanied by sex-specific  
387 patterns of aging in the ventral hippocampus, with critical sex differences in both timing and direction of  
388 transcriptional changes, independent of reproductive senescence in aged females. Our results indicate  
389 sex differences in the trajectory of ventral hippocampal aging that may contribute to age- and sex-  
390 related changes in socioemotional behaviors.

391 Our findings indicate sex differences in anxiety-like behavior that persist throughout aging. As  
392 previously reviewed (Kokras and Dalla 2014), decades of work has shown that female rodents exhibit  
393 decreased anxiety-like behavior as compared to males across most behavioral tests, and that these  
394 effects may be driven by ovarian hormone levels across the rodent estrous cycle (Rocks et al. 2022).  
395 Here we report increased open-arm avoidance on the EPM in male versus female C57Bl/6J mice  
396 across all ages. Consistent with some (Darwish et al. 2001, Boguszewski and Zagrodzka 2002, Narita  
397 et al. 2006, Turner et al. 2012, Stanojlovic et al. 2019, Li et al. 2020, Hirano et al. 2021, Yanai and  
398 Endo 2021), but not all (Frick et al. 2000, Shoji et al. 2016, Shoji and Miyakawa 2019) previous work,  
399 we also report increased open-arm avoidance across aging. Notably these differences cannot be  
400 attributed simply to locomotor differences with aging, as we found no differences in distance traveled in  
401 the open field test. Our results therefore indicate that although there is a general age-related increase  
402 in anxiety-like behavior, sex differences in these behaviors persist across aging.

403 Contrary to some (Boguszewski and Zagrodzka 2002, Salchner et al. 2004, Hunt et al. 2011,  
404 Perkins et al. 2016, Shoji et al. 2016, Gerasimenko et al. 2020), but not all (Guan and Dluzen 1994,



405 Shoji and Miyakawa 2019), previous reports in rodents, we found an age-related increase in social  
406 preference in C57Bl/6J mice. Interestingly, we further report opposing sex differences on social  
407 preference and social recognition independent of aging, with males displaying higher social preference,  
408 but lower social recognition, as compared to females. Both social preference and social recognition  
409 have shown to be profoundly impacted by gonadal hormone signaling (Choleris et al. 2009), yet how  
410 those impacts change with aging were undetermined. Here, our findings indicate baseline sex  
411 differences in social behavior that persist into old age, a time period where social behavior is known to  
412 dramatically improve cognitive and physical health outcomes (Seeman et al. 2001).

413 Our findings also demonstrate effects of age, but not sex, on cued threat memory dynamics. As  
414 previously reviewed (Bauer 2023), reports of sex differences in either cued or contextual threat memory  
415 processes vary greatly. Here we find that cued threat memory generalizes with age, as aged mice no  
416 longer exhibit enhanced freezing to the CS compared to the pre-CS baseline period in the novel  
417 context. Some (Liu et al. 2003, Feiro and Gould 2005, Gemma et al. 2005, Gould and Feiro 2005,  
418 Peleg et al. 2010, Shoji and Miyakawa 2019), but not all (Doyere et al. 2000, Blank et al. 2003, Villeda  
419 et al. 2011), previous reports have shown decreased cued memory recall across aging. However, these  
420 effects are difficult to disentangle from the age-related increase in threat memory generalization  
421 demonstrated here and elsewhere (Feiro and Gould 2005, Shoji et al. 2016, Yanai and Endo 2021), in  
422 addition to previously reported age-related deficits in context discrimination (Corcoran et al. 2002,  
423 Hernandez et al. 2022). Contrary to some (Stoehr and Wenk 1995, Oler and Markus 1998, Doyere et  
424 al. 2000, Corcoran et al. 2002, Gemma et al. 2005, Moyer and Brown 2006, Fukushima et al. 2008,  
425 Kaczorowski and Disterhoft 2009, Villeda et al. 2011, Ehlers et al. 2020, Yanai and Endo 2021,  
426 Hernandez et al. 2022) but not all (Gould and Feiro 2005, Aziz et al. 2019, Shoji and Miyakawa 2019)  
427 previous reports, we find no effects of age on contextual threat memory. However, in our study, context  
428 was conditioned in the background rather than foreground (Huckleberry et al. 2016). Future  
429 experiments should further test the perimeters of age-related threat memory generalization through  
430 both background cue discrimination as well as foreground contextual discrimination paradigms.

431 Although the hippocampus as a whole has long been studied in the contexts of both sex  
432 differences (Koss and Frick 2017) and aging (Rosenzweig and Barnes 2003), far less is known about  
433 the impacts of sex and aging on the ventral hippocampus specifically. Here, we provide the most  
434 comprehensive assessment of the ventral hippocampal transcriptome in males and females across  
435 aging to date. Despite the broad changes in socioemotional behavior we observed across aging, our  
436 analyses of ventral hippocampal transcripts surprisingly revealed only 44 (out of 760) differentially  
437 expressed genes across aging. Of those genes, 11 were similarly upregulated in both sexes across  
438 aging. These shared differentially expressed genes were primarily markers of microglial activation  
439 (*C1qa*, *C1qb*, *C1qc*, *C3*, *Cx3cr1*, *Ncf1*, *Tmem119*, *Trem2*) and angiogenesis (*C1qa*, *C1qb*, *C1qc*, *C3*,  
440 *Cx3cr1*), but also included genes associated with autophagy (*Hexb*), cytoskeleton (*Gfap*), and calcium  
441 signaling (*S100b*). All of these 11 genes have previously been shown to increase with aging in brains of  
442 male mice (Matarin et al. 2015, Ederer et al. 2022), and all but two (*C1qb*, *C1qc*) specifically in the  
443 hippocampus (Matarin et al. 2015, Mangold et al. 2017, Ederer et al. 2022, Lu et al. 2022). One study in  
444 female mice found aging-related increases in several of these genes (*C1qa*, *C1qb*, *Gfap*, *Hexb*  
445 *Tmem119*, *Trem2*) (Mangold et al. 2017), but until now a thorough comparison of sex differences in  
446 ventral hippocampal transcriptional changes with aging has been lacking.

447 In females, most differentially expressed genes were markers of activated microglia (*Cd68*,  
448 *Csf1r*, *Gusb*, *Psm8*, *Tlr2*) and cytokines (*Csf1r*, *Il10ra*, *Vegfa*), though we also report female-specific  
449 upregulation of several genes associated with autophagy (*Cd68*, *Gusb*, *Man2b1*). Of these, *Cd68*,  
450 *Csf1r*, *Man2b1*, *Tlr2*, and *Vegfa* have been shown to increase in the aging hippocampus of female mice  
451 (Chen et al. 2018) and male mice in some (Matarin et al. 2015, Ederer et al. 2022), but not all (Wong et  
452 al. 2005, Yegla and Foster 2022), studies. Although aging-related changes have not been reported in  
453 brain levels of *Gusb*, sex differences across aging were recently reported in skeletal muscle tissue  
454 (Mishra et al. 2023). On the other hand, we report more variability in the functions of genes differentially  
455 expressed in males. We found notable representation of genes associated with angiogenesis (*Ang*,  
456 *C4a*, *Hmox1*, *Nrxn1*), axon and dendrite structure (*Adcy9*, *Apoe*, *Cldn5*, *Dcx*, *Nrg1*), cytokines (*Ccl12*,  
457 *Ccr5*, *Lif*, *Osmr*, *Plekho2*), and neural connectivity (*Ccl12*, *Itpr1*, *Nrxn1*, *Nrg1*) among male differentially

458 expressed genes. Hippocampal expression of all except three (*Ccl12*, *Ccr5*, *Itpr1*) of these male-  
459 specific differentially expressed genes have previously been shown to change in males across aging in  
460 either mice (Matarin et al. 2015, Mangold et al. 2017, Lu et al. 2022) or humans (Berchtold et al. 2008),  
461 although we report opposite direction of changes for two genes (*Adcy9*, *Nrg1*). Additionally, *Dcx*—which  
462 we report is downregulated in the ventral hippocampus of aging males only—is considered a marker of  
463 adult neurogenesis (Couillard-Despres et al. 2005). We also find increased *Dcx* expression in males  
464 compared to females at 4 months (Figure S2), in accordance with a recent report demonstrating higher  
465 levels of neurogenesis in the ventral hippocampus of males versus females in young adulthood  
466 (Hodges et al. 2022), suggesting that *Dcx* may be a male-specific marker of the aging ventral  
467 hippocampus. Interestingly, we report similarly increased markers of cytokines in both sexes, though  
468 the specific genes involved differed between males (*Ccl12*, *Ccr5*, *Lif*, *Osmr*, *Plekho2*) and females  
469 (*Csf1r*, *Il10ra*, *Vegfa*). Previous reports in rodents (Mangold et al. 2017, Porcher et al. 2021) and in  
470 humans (Berchtold et al. 2008) demonstrate more dramatic aging-related increases in transcription of  
471 inflammatory and microglia-related genes in the brains of females versus males. Future work should  
472 explore whether these genes are therefore good candidates for markers of sex differences in  
473 neuroinflammatory responses with aging.

474 Notably, we report sex differences in both the timing and direction of transcriptional changes in  
475 the ventral hippocampus across aging. All female differentially expressed genes were upregulated with  
476 aging and occurred between the 10- and 18-month time points. On the other hand, males displayed a  
477 mix of up- and down-regulated genes that all occurred between the 4- and 10-month time points. These  
478 findings suggest accelerated aging in the ventral hippocampus of males compared to females, contrary  
479 to some (Yuan et al. 2012, Zhao et al. 2016), but not all (Berchtold et al. 2008), previous reports in the  
480 hippocampus and cortex of both rodents and humans, though the number of genes analyzed in these  
481 different studies varies greatly. Considering the transcriptionally unique identity of the ventral  
482 hippocampus (Dong et al. 2009, Floriou-Servou et al. 2018), our data may indicate sub-region and sex-  
483 specific trajectories of transcriptional aging within the hippocampus. Importantly, these differences do  
484 not appear to be mediated by circulating ovarian hormone levels, as we report no transcriptional

485 differences between cycling versus non-cycling 18-month females. These negative effects are  
486 somewhat surprising considering recent work demonstrating changes in chromatin accessibility and  
487 transcriptional patterns across the estrous cycle in the ventral hippocampus of young adult mice (Jaric  
488 et al. 2019). However, the comparisons in the current study may be underpowered due to the low  
489 number of cycling females in the aged group. Aside from circulating hormone levels, other potential  
490 explanations for the seemingly delayed ventral hippocampal aging in females include X-chromosome  
491 linked resiliency (Davis et al. 2019). Future studies employing the four core genotypes mice would be  
492 required to resolve the influence of gonadal versus chromosomal sex on ventral hippocampal aging.

493 Together, our transcriptional data provide the most in-depth insight into sex differences in  
494 ventral hippocampal aging to date, enabled by the considerable sensitivity and broad scope of  
495 NanoString technology. However, one limitation of using the NanoString Neuropathology Panel is that  
496 our investigation is limited to genes specifically known to be involved in neuropathology. Considering  
497 the long history of sex bias in neuroscience research upon which this foundational knowledge is based  
498 (Beery and Zucker 2011), unbiased approaches such as RNA sequencing may therefore reveal more  
499 striking sex- and aging-related differences. Additionally, the false discovery rate correction (Benjamini  
500 et al. 2001) required by large datasets from NanoString technology may contribute to the lack of  
501 changes we report in certain genes (*Cd33*, *Ap2a2*, *Ilf6*, among others) shown to change with aging in  
502 other studies using lower throughput methods such as q-RT-PCR (Ederer et al. 2022).

503 Our initial goal in performing transcriptional analysis of the ventral hippocampus was to identify  
504 specific differentially expressed genes that may be regulating sex- and age-related changes in  
505 socioemotional behaviors. Comparisons of pathway scores across aging narrowed our focus to the  
506 autophagy pathway, which was uniquely increased in both sexes between the 4- and 18-month time  
507 points. Interestingly, autophagy pathway scores were negatively correlated with multiple measures of  
508 socioemotional behaviors in females, but not in males. When these same behaviors were analyzed in  
509 comparison to the four differentially expressed genes in the autophagy pathway, all were similarly  
510 correlated with socioemotional behaviors in females, with only one gene (*Man2b1*) also correlated with  
511 a behavioral measure in males. As autophagy dysfunction is heavily implicated in aging (Kaushik et al.

512 2021), these sex differences in the relationship between autophagy and socioemotional behaviors may  
513 represent key mechanisms underlying sex differences in ventral hippocampal aging. Both gonadal  
514 hormones and sex chromosomes have been shown to mediate sex differences in autophagy function  
515 (Shang et al. 2021), and it has been theorized that sex differences in autophagy may contribute to  
516 increased risk of neurodegenerative disorders in females (Congdon 2018). Considering the female bias  
517 we report in ventral hippocampal expression of autophagy-related genes with aging, these findings  
518 therefore suggest potentially novel female-specific mediators of socioemotional behavior across aging.  
519 Future studies should investigate causal links between these autophagy-related genes and  
520 socioemotional behaviors in order to better understand the mechanisms underlying these sex-specific  
521 associations.

522 In conclusion, this study provides the first broad assessment of sex differences in  
523 socioemotional behaviors across aging and suggests sex-specific trajectories of ventral hippocampal  
524 aging. Our data provide the most large-scale assessment of sex differences in the ventral hippocampal  
525 transcriptome across aging to date and are the first to consider the variables of age and sex in within-  
526 subject correlations between ventral hippocampal transcript levels and socioemotional behaviors.  
527 These findings emphasize the importance of considering sex as a critical factor modulating the impacts  
528 of aging on socioemotional health and lay the foundation for future studies that may lead to therapeutic  
529 interventions targeted to women who make up a disproportionate percentage of the aging population.

### 530 **Figure Legends:**

531 **Figure 1. Sex- and aging-related differences in socioemotional behaviors. A.** Experimental  
532 timeline. Male and female mice at 4, 10, or 18 months of age underwent a battery of socioemotional  
533 behavioral tests, and estrous cycle was tracked via vaginal (female) or sham (male) lavages for 8 days  
534 prior and throughout all experimental procedures. The object location test (OLT) and object recognition  
535 test (ORT) were performed but not presented. Five days following the last behavioral test, mice were  
536 euthanized. **B.** Open arm time on the elevated plus maze (EPM) was decreased with age independent  
537 of sex and was increased in females independent of age. **C.** Percent open arm entries on the EPM was

538 decreased with age independent of sex and was increased in females independent of age. **D.** Distance  
539 traveled in the open field test (OFT) did not vary across age or between sexes. **E.** Center time in the  
540 OFT did not vary across age or between sexes. **F.** Social preference in the social interaction (SI) test  
541 was increased with age independent of sex and was decreased in females independent of age. **G.**  
542 Social recognition (SR) did not vary across age but was increased in females independent of age.  
543 Dashed lines in F-G represent no social preference/recognition. **H.** Normalized percent time freezing to  
544 the conditioned stimulus (CS) decreased with age during the cued threat memory recall test. **I.**  
545 Normalized percent time freezing in the conditioning context did not differ across age or sex. B-I, two-  
546 way ANOVA followed by Bonferroni-corrected *post-hoc* comparisons in the case of a significant  
547 interaction. For statistics, see Table S1. Asterisks below y-axes and to the right of legends depict  
548 significant main effects of age and sex, respectively. \* $p < 0.05$ , \*\* $p < 0.01$ , \*\*\* $p < 0.001$ . n/group  
549 denoted in parentheses under bar histograms.

550 **Figure 2. Sex differences in the timing and identity of transcriptional aging in the ventral**  
551 **hippocampus.** RNA was extracted from the ventral hippocampus of male and female mice at 4, 10,  
552 and 18 months of age and analyzed using the NanoString Neuropathology Panel, which produced  
553 transcript counts for a list of 760 predetermined genes. **A.** Venn diagram demonstrating overlap and  
554 segregation of the 44 transcripts found to be differentially expressed across aging in males and females  
555 (FDR-adjusted  $p$ -values of  $p < 0.1$ ). **B.** Heatmaps of differentially expressed transcripts across aging in  
556 females (left) and males (right), represented as the log<sub>2</sub> fold change between the indicated timepoints.  
557 n=8/group. For statistics, see Table S3.

558 **Figure 3. Sex-specific relationship between autophagy genes and socioemotional behaviors**  
559 **across aging.** **A.** Transcript data were grouped by putative gene function using the nSolver Pathway  
560 Analysis Tool, revealing age-related changes in 4 of the 23 pathways (indicated with superimposed  
561 FDR-adjusted  $p$ -values of  $< 0.05$ ). Subsequent analyses focused on autophagy as a pathway shared  
562 between sexes at the 4- versus 18-month comparison. **B.** The autophagy pathway score correlated with  
563 elevated plus maze (EPM) percent open arm entries (left), EPM open arm time (middle), and



564 normalized freezing to the conditioned stimulus (CS) during cued threat memory recall (right) in females  
565 but not males. Subsequent analysis focused on the individual autophagy genes found to be  
566 differentially expressed across aging. **D.** *Cd68* expression was correlated with EPM percent open arm  
567 entries (left), EPM open arm time (middle) and normalized CS-freezing during cued recall (right) in  
568 females. **E.** *Gusb* expression was correlated with EPM percent open arm entries (left) and EPM open  
569 arm time (middle), but not normalized CS-freezing during cued recall (right), in females. **F.** *Man2b1*  
570 expression was correlated with EPM percent open arm entries (left) and normalized CS-freezing during  
571 cued recall (right) in females and with EPM open arm time (middle) in both sexes. **G.** *Hexb* expression  
572 was correlated with EPM open arm time (middle) and normalized CS-freezing during cued recall (right)  
573 in females. Legend in the bottom right corner applies to all graphs in B-F. B-F, Pearson's correlations.  
574 For statistics, see Tables S5 and S6. \* $p < 0.05$ .  $n=8$ /group.

575 **Figure 4. No differences in socioemotional behavior or ventral hippocampal gene expression**  
576 **between cycling versus non-cycling aged females.** **A.** The proportion of females exhibiting regular  
577 estrous cycles was decreased between the 4- and 18-month and 10- and 18-month time points. **B.**  
578 Representative images of 10 consecutive days of vaginal cytology samples from regular, irregular, and  
579 non-cycling females. Scale bar (100  $\mu\text{m}$ ) is representative of all images. P, proestrus; E, estrus; D,  
580 diestrus. **C.** Uterine index was decreased in non-cycling versus cycling females. **D.** Body weight was  
581 not different between groups. **E.** EPM percent open arm entries was not different between groups. **F.**  
582 Open field test (OFT) distance traveled was not different between groups. **G.** Social preference was not  
583 different between groups. **H.** Social recognition was not different between groups. Dashed lines in F-G  
584 represent no social preference/recognition. **I.** Normalized freezing to the conditioned stimulus (CS)  
585 during cued threat memory recall was not different between groups. **J.** Normalized freezing to the  
586 conditioning context during contextual threat memory recall was not different between groups. **K.**  
587 Heatmap of expression of the 760 assayed transcripts (for ordered list, see Table S3). No differences  
588 were detected between cycling and non-cycling 18-month-old females. **L.** Heatmap of nSolver pathway  
589 scores. No differences were detected between groups. A,  $\chi^2$  test for independence; C-D, Mann-Whitney



590 U test; E-J, two-tailed t-test. For statistics, see Tables S1, S3, and S5. \* $p < 0.05$ , \*\* $p < 0.01$ . n/group  
591 denoted in parentheses under bar histograms in A,C-K; n=4/group in K-L.

## 592 **5. References**

- 593  
594 Anagnostaras, S. G., S. C. Wood, T. Shuman, D. J. Cai, A. D. Leduc, K. R. Zurn, J. B. Zurn, J. R. Sage  
595 and G. M. Herrera (2010). "Automated assessment of pavlovian conditioned freezing and shock  
596 reactivity in mice using the video freeze system." Front Behav Neurosci **4**. DOI:  
597 10.3389/fnbeh.2010.00158.
- 598 Aziz, W., I. Kraev, K. Mizuno, A. Kirby, T. Fang, H. Rupawala, K. Kasbi, S. Rothe, F. Jozsa, K.  
599 Rosenblum, M. G. Stewart and K. P. Giese (2019). "Multi-input Synapses, but Not LTP-Strengthened  
600 Synapses, Correlate with Hippocampal Memory Storage in Aged Mice." Curr Biol **29**(21): 3600-3610  
601 e3604. DOI: 10.1016/j.cub.2019.08.064.
- 602 Bannerman, D. M., J. N. Rawlins, S. B. McHugh, R. M. Deacon, B. K. Yee, T. Bast, W. N. Zhang, H. H.  
603 Pothuisen and J. Feldon (2004). "Regional dissociations within the hippocampus--memory and  
604 anxiety." Neurosci Biobehav Rev **28**(3): 273-283. DOI: 10.1016/j.neubiorev.2004.03.004.
- 605 Bauer, E. P. (2023). "Sex differences in fear responses: Neural circuits." Neuropharmacology **222**:  
606 109298. DOI: 10.1016/j.neuropharm.2022.109298.
- 607 Beery, A. K. and I. Zucker (2011). "Sex bias in neuroscience and biomedical research." Neurosci  
608 Biobehav Rev **35**(3): 565-572. DOI: 10.1016/j.neubiorev.2010.07.002.
- 609 Benjamini, Y., D. Drai, G. Elmer, N. Kafkafi and I. Golani (2001). "Controlling the false discovery rate in  
610 behavior genetics research." Behav Brain Res **125**(1-2): 279-284. DOI: 10.1016/s0166-4328(01)00297-  
611 2.
- 612 Berchtold, N. C., D. H. Cribbs, P. D. Coleman, J. Rogers, E. Head, R. Kim, T. Beach, C. Miller, J.  
613 Troncoso, J. Q. Trojanowski, H. R. Zielke and C. W. Cotman (2008). "Gene expression changes in the  
614 course of normal brain aging are sexually dimorphic." Proc Natl Acad Sci U S A **105**(40): 15605-15610.  
615 DOI: 10.1073/pnas.0806883105.

- 616 Blanchard, R. J. and D. C. Blanchard (1969). "Crouching as an index of fear." J Comp Physiol Psychol  
617 67(3): 370-375. DOI: 10.1037/h0026779.
- 618 Blank, T., I. Nijholt, M. J. Kye, J. Radulovic and J. Spiess (2003). "Small-conductance, Ca<sup>2+</sup>-activated  
619 K<sup>+</sup> channel SK3 generates age-related memory and LTP deficits." Nat Neurosci 6(9): 911-912. DOI:  
620 10.1038/nn1101.
- 621 Boguszewski, P. and J. Zagrodzka (2002). "Emotional changes related to age in rats--a behavioral  
622 analysis." Behav Brain Res 133(2): 323-332. DOI: 10.1016/s0166-4328(02)00018-9.
- 623 Cao, Z., S. S. Harvey, T. Chiang, A. G. Foltz, A. G. Lee, M. Y. Cheng and G. K. Steinberg (2021).  
624 "Unique Subtype of Microglia in Degenerative Thalamus After Cortical Stroke." Stroke 52(2): 687-698.  
625 DOI: 10.1161/STROKEAHA.120.032402.
- 626 Charles, S. T. and L. L. Carstensen (2010). "Social and emotional aging." Annu Rev Psychol 61: 383-  
627 409. DOI: 10.1146/annurev.psych.093008.100448.
- 628 Chen, Y., M. Yin, X. Cao, G. Hu and M. Xiao (2018). "Pro- and Anti-inflammatory Effects of High  
629 Cholesterol Diet on Aged Brain." Aging Dis 9(3): 374-390. DOI: 10.14336/AD.2017.0706.
- 630 Choleris, E., A. E. Clipperton-Allen, A. Phan and M. Kavaliers (2009). "Neuroendocrinology of social  
631 information processing in rats and mice." Front Neuroendocrinol 30(4): 442-459. DOI:  
632 10.1016/j.yfrne.2009.05.003.
- 633 Congdon, E. E. (2018). "Sex Differences in Autophagy Contribute to Female Vulnerability in  
634 Alzheimer's Disease." Front Neurosci 12: 372. DOI: 10.3389/fnins.2018.00372.
- 635 Cora, M. C., L. Kooistra and G. Travlos (2015). "Vaginal Cytology of the Laboratory Rat and Mouse:  
636 Review and Criteria for the Staging of the Estrous Cycle Using Stained Vaginal Smears." Toxicologic  
637 Pathology 43(6): 776-793. DOI: 10.1177/0192623315570339.
- 638 Corcoran, K. A., Y. Lu, R. S. Turner and S. Maren (2002). "Overexpression of hAPP<sup>swe</sup> impairs  
639 rewarded alternation and contextual fear conditioning in a transgenic mouse model of Alzheimer's  
640 disease." Learn Mem 9(5): 243-252. DOI: 10.1101/lm.51002.

- 641 Couillard-Despres, S., B. Winner, S. Schaubeck, R. Aigner, M. Vroemen, N. Weidner, U. Bogdahn, J.  
642 Winkler, H. G. Kuhn and L. Aigner (2005). "Doublecortin expression levels in adult brain reflect  
643 neurogenesis." Eur J Neurosci **21**(1): 1-14. DOI: 10.1111/j.1460-9568.2004.03813.x.
- 644 Darwish, M., L. Koranyi, C. Nyakas and O. F. Almeida (2001). "Exposure to a novel stimulus reduces  
645 anxiety level in adult and aging rats." Physiol Behav **72**(3): 403-407. DOI: 10.1016/s0031-  
646 9384(00)00424-8.
- 647 Davis, E. J., I. Lobach and D. B. Dubal (2019). "Female XX sex chromosomes increase survival and  
648 extend lifespan in aging mice." Aging Cell **18**(1): e12871. DOI: 10.1111/accel.12871.
- 649 Domonkos, E., V. Borbelyova, M. Csongova, M. Bosy, M. Kacmarova, D. Ostatnikova, J. Hodosy and  
650 P. Celec (2017). "Sex differences and sex hormones in anxiety-like behavior of aging rats." Horm  
651 Behav **93**: 159-165. DOI: 10.1016/j.yhbeh.2017.05.019.
- 652 Dong, H. W., L. W. Swanson, L. Chen, M. S. Fanselow and A. W. Toga (2009). "Genomic-anatomic  
653 evidence for distinct functional domains in hippocampal field CA1." Proc Natl Acad Sci U S A **106**(28):  
654 11794-11799. DOI: 10.1073/pnas.0812608106.
- 655 Doyere, V., P. Gisquet-Verrier, B. de Marsanich and M. Ammassari-Teule (2000). "Age-related  
656 modifications of contextual information processing in rats: role of emotional reactivity, arousal and  
657 testing procedure." Behav Brain Res **114**(1-2): 153-165. DOI: 10.1016/s0166-4328(00)00223-0.
- 658 du Plessis, K. C., S. Basu, T. H. Rumbell and E. K. Lucas (2022). "Sex-Specific Neural Networks of  
659 Cued Threat Conditioning: A Pilot Study." Front Syst Neurosci **16**: 832484. DOI:  
660 10.3389/fnsys.2022.832484.
- 661 Ederer, M. L., M. Gunther, L. Best, J. Lindner, C. Kaleta, O. W. Witte, R. Simon and C. Frahm (2022).  
662 "Voluntary Wheel Running in Old C57BL/6 Mice Reduces Age-Related Inflammation in the Colon but  
663 Not in the Brain." Cells **11**(3). DOI: 10.3390/cells11030566.
- 664 Ehlers, V. L., C. W. Smies and J. R. Moyer, Jr. (2020). "Apoaequorin differentially modulates fear  
665 memory in adult and aged rats." Brain Behav **10**(11): e01832. DOI: 10.1002/brb3.1832.
- 666 Evans, J. S., R. F. Varney and F. C. Koch (1941). "The mouse uterine weight method for the assay of  
667 estrogens." Endocrinology **28**(5): 747-752. DOI: doi.org/10.1210/endo-28-5-747.

- 668 Fanselow, M. S. (1980). "Conditioned and unconditional components of post-shock freezing." Pavlov J  
669 Biol Sci **15**(4): 177-182. DOI: 10.1007/BF03001163.
- 670 Fanselow, M. S. and H. W. Dong (2010). "Are the dorsal and ventral hippocampus functionally distinct  
671 structures?" Neuron **65**(1): 7-19. DOI: 10.1016/j.neuron.2009.11.031.
- 672 Feiro, O. and T. J. Gould (2005). "The interactive effects of nicotinic and muscarinic cholinergic  
673 receptor inhibition on fear conditioning in young and aged C57BL/6 mice." Pharmacol Biochem Behav  
674 **80**(2): 251-262. DOI: 10.1016/j.pbb.2004.11.005.
- 675 Felicio, L. S., J. F. Nelson and C. E. Finch (1984). "Longitudinal studies of estrous cyclicity in aging  
676 C57BL/6J mice: II. Cessation of cyclicity and the duration of persistent vaginal cornification." Biol  
677 Reprod **31**(3): 446-453. DOI: 10.1095/biolreprod31.3.446.
- 678 Floriou-Servou, A., L. von Ziegler, L. Stalder, O. Sturman, M. Privitera, A. Rassi, A. Cremonesi, B.  
679 Thony and J. Bohacek (2018). "Distinct Proteomic, Transcriptomic, and Epigenetic Stress Responses  
680 in Dorsal and Ventral Hippocampus." Biol Psychiatry **84**(7): 531-541. DOI:  
681 10.1016/j.biopsych.2018.02.003.
- 682 Flurkey, K., J. M. Curren and D. E. Harrison (2007). Chapter 20 - Mouse Models in Aging Research.  
683 The Mouse in Biomedical Research. Burlington, MA, Elsevier. **III**.
- 684 Frick, K. M., L. A. Burlingame, J. A. Arters and J. Berger-Sweeney (2000). "Reference memory, anxiety  
685 and estrous cyclicity in C57BL/6NIA mice are affected by age and sex." Neuroscience **95**(1): 293-307.  
686 DOI: 10.1016/s0306-4522(99)00418-2.
- 687 Fukushima, H., R. Maeda, R. Suzuki, A. Suzuki, M. Nomoto, H. Toyoda, L. J. Wu, H. Xu, M. G. Zhao,  
688 K. Ueda, A. Kitamoto, N. Mamiya, T. Yoshida, S. Homma, S. Masushige, M. Zhuo and S. Kida (2008).  
689 "Upregulation of calcium/calmodulin-dependent protein kinase IV improves memory formation and  
690 rescues memory loss with aging." J Neurosci **28**(40): 9910-9919. DOI: 10.1523/JNEUROSCI.2625-  
691 08.2008.
- 692 Gater, R., M. Tansella, A. Korten, B. G. Tiemens, V. G. Mavreas and M. O. Olatawura (1998). "Sex  
693 differences in the prevalence and detection of depressive and anxiety disorders in general health care

694 settings: report from the World Health Organization Collaborative Study on Psychological Problems in  
695 General Health Care." Arch Gen Psychiatry **55**(5): 405-413. DOI: 10.1001/archpsyc.55.5.405.

696 Geiss, G. K., R. E. Bumgarner, B. Birditt, T. Dahl, N. Dowidar, D. L. Dunaway, H. P. Fell, S. Ferree, R.  
697 D. George, T. Grogan, J. J. James, M. Maysuria, J. D. Mitton, P. Oliveri, J. L. Osborn, T. Peng, A. L.  
698 Ratcliffe, P. J. Webster, E. H. Davidson, L. Hood and K. Dimitrov (2008). "Direct multiplexed  
699 measurement of gene expression with color-coded probe pairs." Nat Biotechnol **26**(3): 317-325. DOI:  
700 10.1038/nbt1385.

701 Gemma, C., M. Fister, C. Hudson and P. C. Bickford (2005). "Improvement of memory for context by  
702 inhibition of caspase-1 in aged rats." Eur J Neurosci **22**(7): 1751-1756. DOI: 10.1111/j.1460-  
703 9568.2005.04334.x.

704 Gerasimenko, M., O. Lopatina, A. A. Shabalova, S. M. Cherepanov, A. B. Salmina, S. Yokoyama, H.  
705 Goto, H. Okamoto, Y. Yamamoto, K. Ishihara and H. Higashida (2020). "Distinct physical condition and  
706 social behavior phenotypes of CD157 and CD38 knockout mice during aging." PLoS One **15**(12):  
707 e0244022. DOI: 10.1371/journal.pone.0244022.

708 Gill, T. M., J. T. Robison and M. E. Tinetti (1997). "Predictors of recovery in activities of daily living  
709 among disabled older persons living in the community." J Gen Intern Med **12**(12): 757-762. DOI:  
710 10.1046/j.1525-1497.1997.07161.x.

711 Gould, T. J. and O. R. Feiro (2005). "Age-related deficits in the retention of memories for cued fear  
712 conditioning are reversed by galantamine treatment." Behav Brain Res **165**(2): 160-171. DOI:  
713 10.1016/j.bbr.2005.06.040.

714 Guan, X. and D. E. Dluzen (1994). "Age related changes of social memory/recognition in male Fischer  
715 344 rats." Behav Brain Res **61**(1): 87-90. DOI: 10.1016/0166-4328(94)90011-6.

716 Hagg, S. and J. Jylhava (2021). "Sex differences in biological aging with a focus on human studies."  
717 Elife **10**. DOI: 10.7554/eLife.63425.

718 Hernandez, A. R., L. M. Truckenbrod, K. T. Campos, S. A. Williams and S. N. Burke (2020). "Sex  
719 differences in age-related impairments vary across cognitive and physical assessments in rats." Behav  
720 Neurosci **134**(2): 69-81. DOI: 10.1037/bne0000352.

- 721 Hernandez, C. M., N. L. Jackson, A. R. Hernandez and L. L. McMahon (2022). "Impairments in Fear  
722 Extinction Memory and Basolateral Amygdala Plasticity in the TgF344-AD Rat Model of Alzheimer's  
723 Disease Are Distinct from Nonpathological Aging." *eNeuro* **9**(3). DOI: 10.1523/ENEURO.0181-22.2022.
- 724 Hirano, T., Y. Miyata, S. Kubo, S. Ohno, K. Onaru, M. Maeda, S. Kitauchi, M. Nishi, Y. Tabuchi, Y.  
725 Ikenaka, T. Ichise, S. M. M. Nakayama, M. Ishizuka, K. Arizono, K. Takahashi, K. Kato, Y. Mantani, T.  
726 Yokoyama and N. Hoshi (2021). "Aging-related changes in the sensitivity of behavioral effects of the  
727 neonicotinoid pesticide clothianidin in male mice." *Toxicol Lett* **342**: 95-103. DOI:  
728 10.1016/j.toxlet.2021.02.010.
- 729 Hodges, T. E., S. E. Lieblich, R. K. Rechlin and L. A. M. Galea (2022). "Sex differences in inflammation  
730 in the hippocampus and amygdala across the lifespan in rats: associations with cognitive bias." *Immun*  
731 *Ageing* **19**(1): 43. DOI: 10.1186/s12979-022-00299-4.
- 732 Houston, F. P., G. D. Stevenson, B. L. McNaughton and C. A. Barnes (1999). "Effects of age on the  
733 generalization and incubation of memory in the F344 rat." *Learn Mem* **6**(2): 111-119.
- 734 Huckleberry, K. A., L. B. Ferguson and M. R. Drew (2016). "Behavioral mechanisms of context fear  
735 generalization in mice." *Learn Mem* **23**(12): 703-709. DOI: 10.1101/lm.042374.116.
- 736 Hunt, G. E., P. S. Van Nieuwenhuijzen, T. Chan-Ling and I. S. McGregor (2011). "'When an old rat  
737 smells a cat': A decline in defense-related, but not accessory olfactory, Fos expression in aged rats."  
738 *Neurobiol Aging* **32**(4): 737-749. DOI: 10.1016/j.neurobiolaging.2009.03.014.
- 739 Jacobs, N. S., J. D. Cushman and M. S. Fanselow (2010). "The accurate measurement of fear memory  
740 in Pavlovian conditioning: Resolving the baseline issue." *J Neurosci Methods* **190**(2): 235-239. DOI:  
741 10.1016/j.jneumeth.2010.04.029.
- 742 Jaric, I., D. Rocks, J. M. Grealley, M. Suzuki and M. Kundakovic (2019). "Chromatin organization in the  
743 female mouse brain fluctuates across the oestrous cycle." *Nat Commun* **10**(1): 2851. DOI:  
744 10.1038/s41467-019-10704-0.
- 745 Kaczorowski, C. C. and J. F. Disterhoft (2009). "Memory deficits are associated with impaired ability to  
746 modulate neuronal excitability in middle-aged mice." *Learn Mem* **16**(6): 362-366. DOI:  
747 10.1101/lm.1365609.

- 748 Kaushik, S., I. Tasset, E. Arias, O. Pampliega, E. Wong, M. Martinez-Vicente and A. M. Cuervo (2021).  
749 "Autophagy and the hallmarks of aging." *Ageing Res Rev* **72**: 101468. DOI: 10.1016/j.arr.2021.101468.
- 750 Kessler, R. C., K. A. McGonagle, S. Zhao, C. B. Nelson, M. Hughes, S. Eshleman, H. U. Wittchen and  
751 K. S. Kendler (1994). "Lifetime and 12-month prevalence of DSM-III-R psychiatric disorders in the  
752 United States. Results from the National Comorbidity Survey." *Arch Gen Psychiatry* **51**(1): 8-19. DOI:  
753 10.1001/archpsyc.1994.03950010008002.
- 754 Kokras, N. and C. Dalla (2014). "Sex differences in animal models of psychiatric disorders." *Br J*  
755 *Pharmacol* **171**(20): 4595-4619. DOI: 10.1111/bph.12710.
- 756 Koss, W. A. and K. M. Frick (2017). "Sex differences in hippocampal function." *J Neurosci Res* **95**(1-2):  
757 539-562. DOI: 10.1002/jnr.23864.
- 758 Lemaitre, J. F., V. Ronget, M. Tidiere, D. Allaine, V. Berger, A. Cohas, F. Colchero, D. A. Conde, M.  
759 Garratt, A. Liker, G. A. B. Marais, A. Scheuerlein, T. Szekely and J. M. Gaillard (2020). "Sex differences  
760 in adult lifespan and aging rates of mortality across wild mammals." *Proc Natl Acad Sci U S A* **117**(15):  
761 8546-8553. DOI: 10.1073/pnas.1911999117.
- 762 Li, M., S. Su, W. Cai, J. Cao, X. Miao, W. Zang, S. Gao, Y. Xu, J. Yang, Y. X. Tao and Y. Ai (2020).  
763 "Differentially Expressed Genes in the Brain of Aging Mice With Cognitive Alteration and Depression-  
764 and Anxiety-Like Behaviors." *Front Cell Dev Biol* **8**: 814. DOI: 10.3389/fcell.2020.00814.
- 765 Liu, R., I. Y. Liu, X. Bi, R. F. Thompson, S. R. Doctrow, B. Malfroy and M. Baudry (2003). "Reversal of  
766 age-related learning deficits and brain oxidative stress in mice with superoxide dismutase/catalase  
767 mimetics." *Proc Natl Acad Sci U S A* **100**(14): 8526-8531. DOI: 10.1073/pnas.1332809100.
- 768 Lu, Y., K. Xu, D. Lin, S. Wang, R. Fu, X. Deng, G. Croppi and J. Zhang (2022). "Multi-omics analysis  
769 reveals neuroinflammation, activated glial signaling, and dysregulated synaptic signaling and  
770 metabolism in the hippocampus of aged mice." *Front Aging Neurosci* **14**: 964429. DOI:  
771 10.3389/fnagi.2022.964429.
- 772 Lucas, E. K., A. Jegarl and R. L. Clem (2014). "Mice lacking TrkB in parvalbumin-positive cells exhibit  
773 sexually dimorphic behavioral phenotypes." *Behav Brain Res* **274**: 219-225. DOI:  
774 10.1016/j.bbr.2014.08.011.



775 Malkov, V. A., K. A. Serikawa, N. Balantac, J. Watters, G. Geiss, A. Mashadi-Hosseini and T. Fare  
776 (2009). "Multiplexed measurements of gene signatures in different analytes using the Nanostring  
777 nCounter Assay System." BMC Res Notes **2**: 80. DOI: 10.1186/1756-0500-2-80.

778 Mangold, C. A., B. Wronowski, M. Du, D. R. Masser, N. Hadad, G. V. Bixler, R. M. Brucklacher, M. M.  
779 Ford, W. E. Sonntag and W. M. Freeman (2017). "Sexually divergent induction of microglial-associated  
780 neuroinflammation with hippocampal aging." J Neuroinflammation **14**(1): 141. DOI: 10.1186/s12974-  
781 017-0920-8.

782 Matarin, M., D. A. Salih, M. Yasvoina, D. M. Cummings, S. Guelfi, W. Liu, M. A. Nahaboo Solim, T. G.  
783 Moens, R. M. Paublete, S. S. Ali, M. Perona, R. Desai, K. J. Smith, J. Latcham, M. Fulleylove, J. C.  
784 Richardson, J. Hardy and F. A. Edwards (2015). "A genome-wide gene-expression analysis and  
785 database in transgenic mice during development of amyloid or tau pathology." Cell Rep **10**(4): 633-644.  
786 DOI: 10.1016/j.celrep.2014.12.041.

787 Mishra, M., A. E. Kane, A. P. Young and S. E. Howlett (2023). "Age, sex, and frailty modify the  
788 expression of common reference genes in skeletal muscle from ageing mice." Mech Ageing Dev **210**:  
789 111762. DOI: 10.1016/j.mad.2022.111762.

790 Moyer, J. R., Jr. and T. H. Brown (2006). "Impaired trace and contextual fear conditioning in aged rats."  
791 Behav Neurosci **120**(3): 612-624. DOI: 10.1037/0735-7044.120.3.612.

792 Narita, M., N. Kuzumaki, M. Narita, C. Kaneko, E. Tamai, J. Khotib, M. Miyatake, K. Shindo, Y.  
793 Nagumo, S. Tanaka and T. Suzuki (2006). "Age-related emotionality is associated with cortical delta-  
794 opioid receptor dysfunction-dependent astrogliosis." Neuroscience **137**(4): 1359-1367. DOI:  
795 10.1016/j.neuroscience.2005.10.067.

796 Oler, J. A. and E. J. Markus (1998). "Age-related deficits on the radial maze and in fear conditioning:  
797 hippocampal processing and consolidation." Hippocampus **8**(4): 402-415. DOI: 10.1002/(SICI)1098-  
798 1063(1998)8:4<402::AID-HIPO8>3.0.CO;2-I.

799 Palkovits, M. (1983). "Punch sampling biopsy technique." Methods Enzymol **103**: 368-376. DOI:  
800 10.1016/s0076-6879(83)03025-6.

801 Peleg, S., F. Sananbenesi, A. Zovoilis, S. Burkhardt, S. Bahari-Javan, R. C. Agis-Balboa, P. Cota, J. L.  
802 Wittnam, A. Gogol-Doering, L. Opitz, G. Salinas-Riester, M. Dettenhofer, H. Kang, L. Farinelli, W. Chen  
803 and A. Fischer (2010). "Altered histone acetylation is associated with age-dependent memory  
804 impairment in mice." Science **328**(5979): 753-756. DOI: 10.1126/science.1186088.

805 Perkins, A. E., T. L. Doremus-Fitzwater, R. L. Spencer, E. I. Varlinskaya, M. M. Conti, C. Bishop and T.  
806 Deak (2016). "A working model for the assessment of disruptions in social behavior among aged rats:  
807 The role of sex differences, social recognition, and sensorimotor processes." Exp Gerontol **76**: 46-57.  
808 DOI: 10.1016/j.exger.2016.01.012.

809 Porcher, L., S. Bruckmeier, S. D. Burbano, J. E. Finnell, N. Gorny, J. Klett, S. K. Wood and M. P. Kelly  
810 (2021). "Aging triggers an upregulation of a multitude of cytokines in the male and especially the female  
811 rodent hippocampus but more discrete changes in other brain regions." J Neuroinflammation **18**(1):  
812 219. DOI: 10.1186/s12974-021-02252-6.

813 Preuss, C., R. Pandey, E. Piazza, A. Fine, A. Uyar, T. Perumal, D. Garceau, K. P. Kotredes, H.  
814 Williams, L. M. Mangravite, B. T. Lamb, A. L. Oblak, G. R. Howell, M. Sasner, B. A. Logsdon, M.-A.  
815 Consortium and G. W. Carter (2020). "A novel systems biology approach to evaluate mouse models of  
816 late-onset Alzheimer's disease." Mol Neurodegener **15**(1): 67. DOI: 10.1186/s13024-020-00412-5.

817 Reis, P. P., L. Waldron, R. S. Goswami, W. Xu, Y. Xuan, B. Perez-Ordóñez, P. Gullane, J. Irish, I.  
818 Jurisica and S. Kamel-Reid (2011). "mRNA transcript quantification in archival samples using  
819 multiplexed, color-coded probes." BMC Biotechnol **11**: 46. DOI: 10.1186/1472-6750-11-46.

820 Rocks, D., H. Cham and M. Kundakovic (2022). "Why the estrous cycle matters for neuroscience." Biol  
821 Sex Differ **13**(1): 62. DOI: 10.1186/s13293-022-00466-8.

822 Rodgers, R. J., B. J. Cao, A. Dalvi and A. Holmes (1997). "Animal models of anxiety: an ethological  
823 perspective." Braz J Med Biol Res **30**(3): 289-304. DOI: 10.1590/s0100-879x1997000300002.

824 Rosenzweig, E. S. and C. A. Barnes (2003). "Impact of aging on hippocampal function: plasticity,  
825 network dynamics, and cognition." Prog Neurobiol **69**(3): 143-179. DOI: 10.1016/s0301-  
826 0082(02)00126-0.

- 827 Salchner, P., G. Lubec and N. Singewald (2004). "Decreased social interaction in aged rats may not  
828 reflect changes in anxiety-related behaviour." Behav Brain Res **151**(1-2): 1-8. DOI:  
829 10.1016/j.bbr.2003.07.002.
- 830 Seeman, T. E., T. M. Lusignolo, M. Albert and L. Berkman (2001). "Social relationships, social support,  
831 and patterns of cognitive aging in healthy, high-functioning older adults: MacArthur studies of  
832 successful aging." Health Psychol **20**(4): 243-255. DOI: 10.1037//0278-6133.20.4.243.
- 833 Shang, D., L. Wang, D. J. Klionsky, H. Cheng and R. Zhou (2021). "Sex differences in autophagy-  
834 mediated diseases: toward precision medicine." Autophagy **17**(5): 1065-1076. DOI:  
835 10.1080/15548627.2020.1752511.
- 836 Shoji, H. and T. Miyakawa (2019). "Age-related behavioral changes from young to old age in male mice  
837 of a C57BL/6J strain maintained under a genetic stability program." Neuropsychopharmacol Rep **39**(2):  
838 100-118. DOI: 10.1002/npr2.12052.
- 839 Shoji, H., K. Takao, S. Hattori and T. Miyakawa (2016). "Age-related changes in behavior in C57BL/6J  
840 mice from young adulthood to middle age." Mol Brain **9**: 11. DOI: 10.1186/s13041-016-0191-9.
- 841 Smith, E. R. and X. X. Xu (2008). "Ovarian ageing, follicle depletion, and cancer: a hypothesis for the  
842 aetiology of epithelial ovarian cancer involving follicle depletion." Lancet Oncol **9**(11): 1108-1111. DOI:  
843 10.1016/S1470-2045(08)70281-X.
- 844 Stanley, D. A. and R. Adolphs (2013). "Toward a neural basis for social behavior." Neuron **80**(3): 816-  
845 826. DOI: 10.1016/j.neuron.2013.10.038.
- 846 Stanojlovic, M., J. P. Pallais Yllescas, Jr., V. Mavanji and C. Kotz (2019). "Chemogenetic activation of  
847 orexin/hypocretin neurons ameliorates aging-induced changes in behavior and energy expenditure."  
848 Am J Physiol Regul Integr Comp Physiol **316**(5): R571-R583. DOI: 10.1152/ajpregu.00383.2018.
- 849 Stoehr, J. D. and G. L. Wenk (1995). "Effects of Age and Lesions of the Nucleus Basalis on Contextual  
850 Fear Conditioning." Psychobiology **23**(3): 173-177.
- 851 Tejada, L. D. and E. F. Rissman (2012). "Sex differences in social investigation: effects of androgen  
852 receptors, hormones and test partner." J Neuroendocrinol **24**(8): 1144-1153. DOI: 10.1111/j.1365-  
853 2826.2012.02322.x.

854 Turner, R. C., M. J. Seminerio, Z. J. Naser, J. N. Ford, S. J. Martin, R. R. Matsumoto, C. L. Rosen and  
855 J. D. Huber (2012). "Effects of aging on behavioral assessment performance: implications for clinically  
856 relevant models of neurological disease." *J Neurosurg* **117**(3): 629-637. DOI:  
857 10.3171/2012.5.JNS112224.

858 Veldman-Jones, M. H., R. Brant, C. Rooney, C. Geh, H. Emery, C. G. Harbron, M. Wappett, A. Sharpe,  
859 M. Dymond, J. C. Barrett, E. A. Harrington and G. Marshall (2015). "Evaluating Robustness and  
860 Sensitivity of the NanoString Technologies nCounter Platform to Enable Multiplexed Gene Expression  
861 Analysis of Clinical Samples." *Cancer Res* **75**(13): 2587-2593. DOI: 10.1158/0008-5472.CAN-15-0262.

862 Villeda, S. A., J. Luo, K. I. Mosher, B. Zou, M. Britschgi, G. Bieri, T. M. Stan, N. Fainberg, Z. Ding, A.  
863 Eggel, K. M. Lucin, E. Czirr, J. S. Park, S. Couillard-Despres, L. Aigner, G. Li, E. R. Peskind, J. A.  
864 Kaye, J. F. Quinn, D. R. Galasko, X. S. Xie, T. A. Rando and T. Wyss-Coray (2011). "The ageing  
865 systemic milieu negatively regulates neurogenesis and cognitive function." *Nature* **477**(7362): 90-94.  
866 DOI: 10.1038/nature10357.

867 Walf, A. A. and C. A. Frye (2006). "A review and update of mechanisms of estrogen in the  
868 hippocampus and amygdala for anxiety and depression behavior." *Neuropsychopharmacology* **31**(6):  
869 1097-1111. DOI: 10.1038/sj.npp.1301067.

870 Wang, C., Y. Zhang, S. Shao, S. Cui, Y. Wan and M. Yi (2019). "Ventral Hippocampus Modulates  
871 Anxiety-Like Behavior in Male But Not Female C57BL/6  $\times$  J Mice." *Neuroscience* **418**: 50-58. DOI:  
872 10.1016/j.neuroscience.2019.08.032.

873 Weissman, M. M., R. C. Bland, G. J. Canino, C. Faravelli, S. Greenwald, H. G. Hwu, P. R. Joyce, E. G.  
874 Karam, C. K. Lee, J. Lellouch, J. P. Lepine, S. C. Newman, M. Rubio-Stipec, J. E. Wells, P. J.  
875 Wickramaratne, H. Wittchen and E. K. Yeh (1996). "Cross-national epidemiology of major depression  
876 and bipolar disorder." *JAMA* **276**(4): 293-299.

877 Williams, E. S., C. E. Manning, A. L. Eagle, A. Swift-Gallant, N. Duque-Wilckens, S. Chinnusamy, A.  
878 Moeser, C. Jordan, G. Leininger and A. J. Robison (2020). "Androgen-Dependent Excitability of  
879 Mouse Ventral Hippocampal Afferents to Nucleus Accumbens Underlies Sex-Specific Susceptibility to  
880 Stress." *Biol Psychiatry* **87**(6): 492-501. DOI: 10.1016/j.biopsych.2019.08.006.

881 Wong, A. M., N. V. Patel, N. K. Patel, M. Wei, T. E. Morgan, M. C. de Beer, W. J. de Villiers and C. E.  
882 Finch (2005). "Macrosialin increases during normal brain aging are attenuated by caloric restriction."  
883 Neurosci Lett **390**(2): 76-80. DOI: 10.1016/j.neulet.2005.07.058.

884 Yanai, S. and S. Endo (2021). "Functional Aging in Male C57BL/6J Mice Across the Life-Span: A  
885 Systematic Behavioral Analysis of Motor, Emotional, and Memory Function to Define an Aging  
886 Phenotype." Front Aging Neurosci **13**: 697621. DOI: 10.3389/fnagi.2021.697621.

887 Yegla, B. and T. C. Foster (2022). "Operationally defining cognitive reserve genes." Neurobiol Aging  
888 **110**: 96-105. DOI: 10.1016/j.neurobiolaging.2021.08.015.

889 Yuan, Y., Y. P. Chen, J. Boyd-Kirkup, P. Khaitovich and M. Somel (2012). "Accelerated aging-related  
890 transcriptome changes in the female prefrontal cortex." Aging Cell **11**(5): 894-901. DOI: 10.1111/j.1474-  
891 9726.2012.00859.x.

892 Zhao, L., Z. Mao, S. K. Woody and R. D. Brinton (2016). "Sex differences in metabolic aging of the  
893 brain: insights into female susceptibility to Alzheimer's disease." Neurobiol Aging **42**: 69-79. DOI:  
894 10.1016/j.neurobiolaging.2016.02.011.

895

896

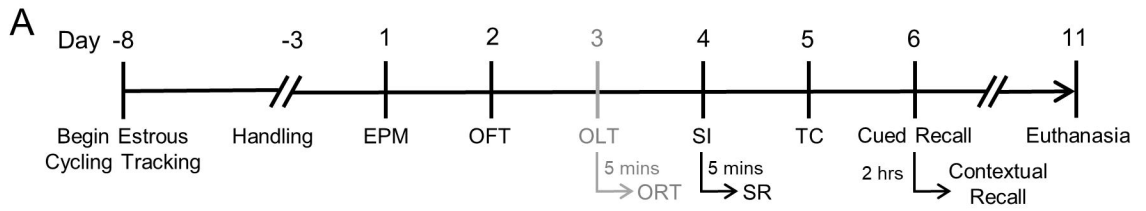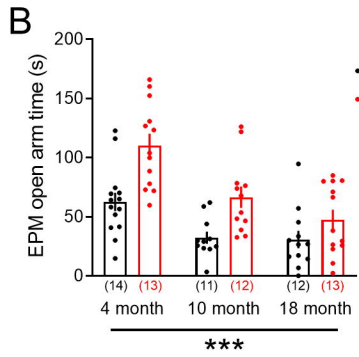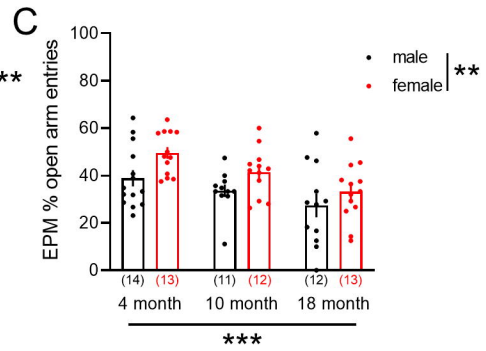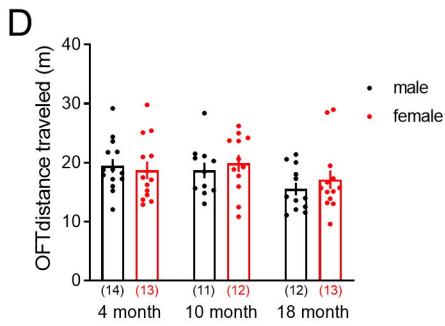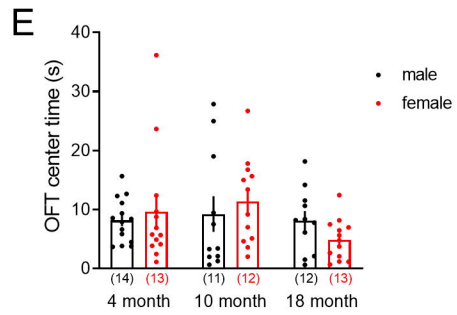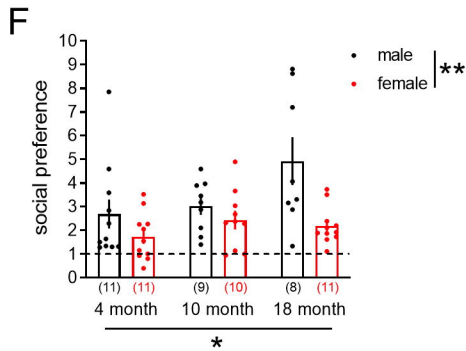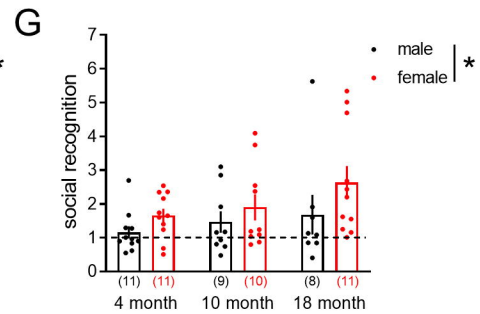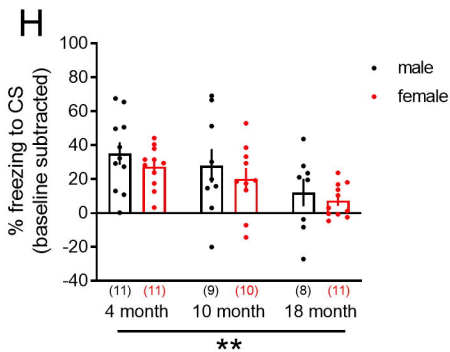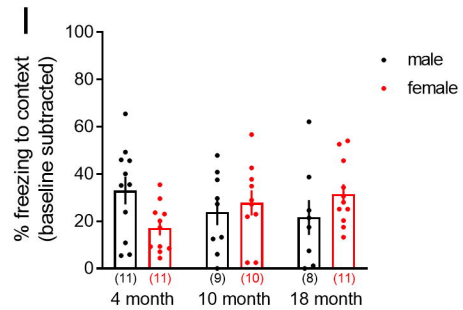

A

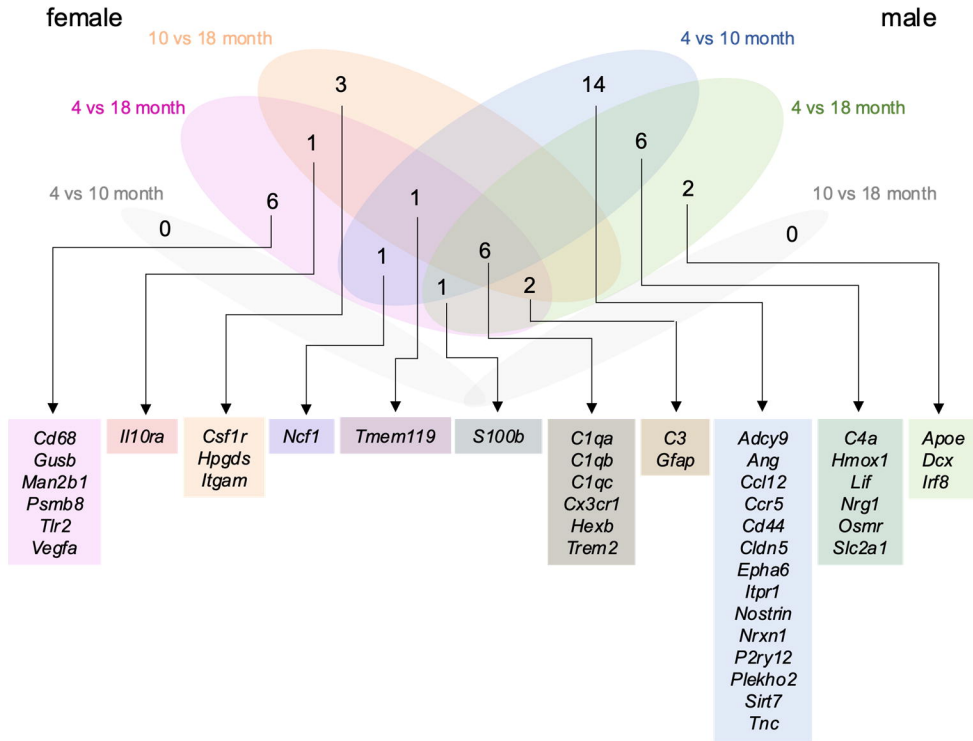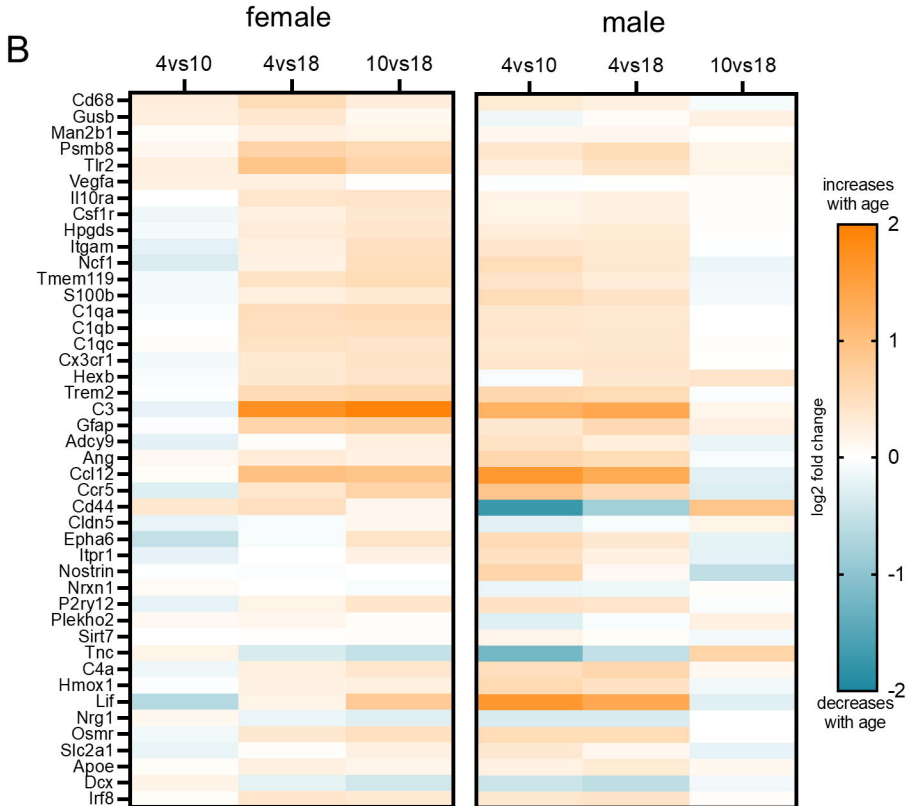



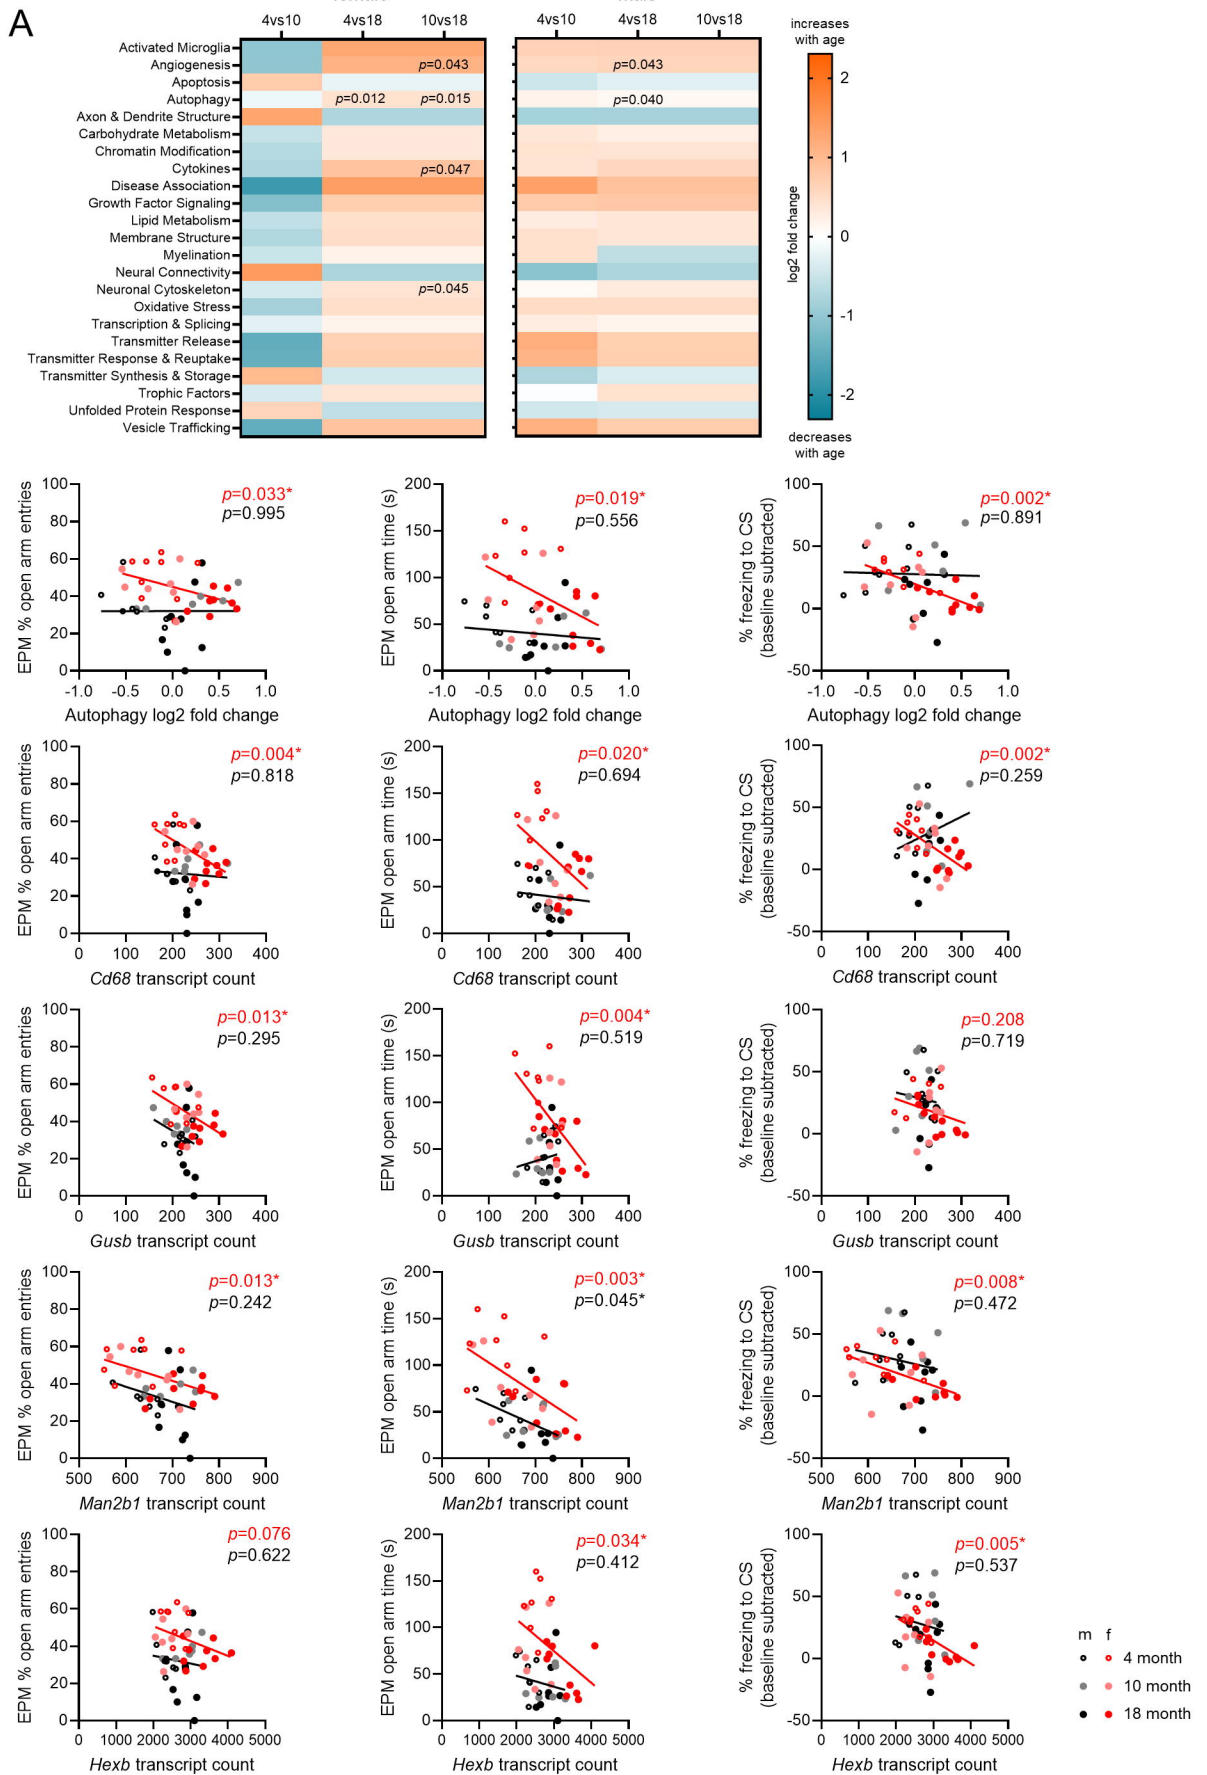

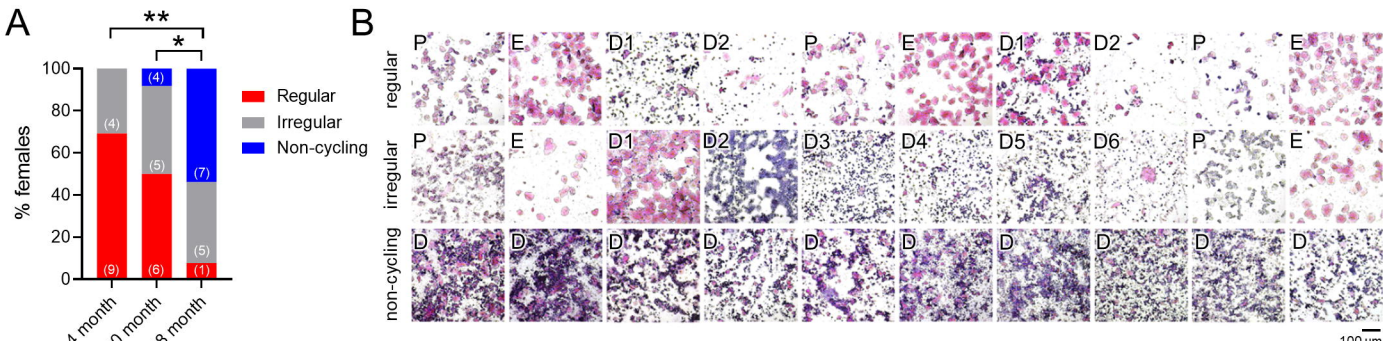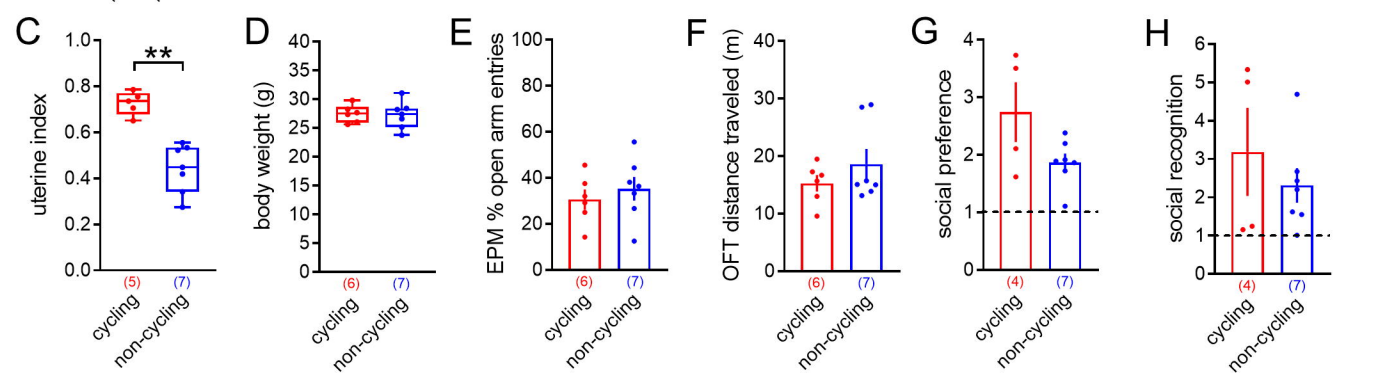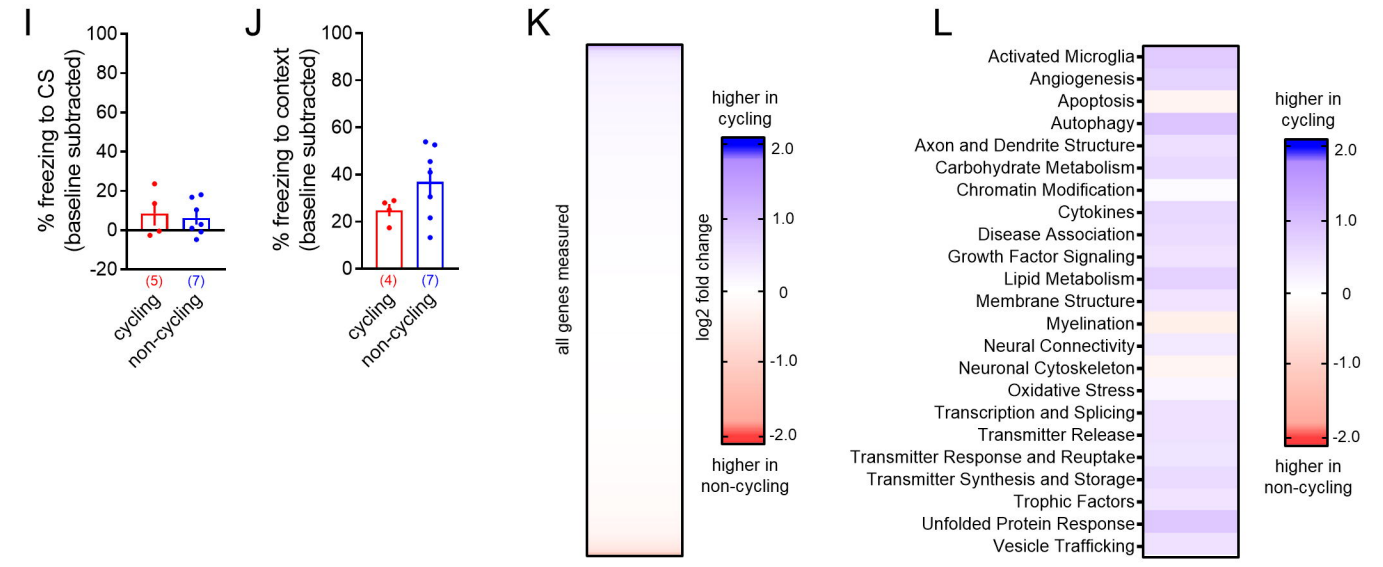

Source: https://www.biorxiv.org/content/biorxiv/early/2023/05/01/2023.05.01.538951.full.pdf?%3Fcollection=
